# Supplementary material
Source: publisher figshare collection journal article supplement (https://gsajournals.figshare.com/ndownloader/files/13576655)
Supplement: Supplementary file 1 [file 13576655]

**SUPPLEMENTARY INFORMATION**

Ah Rume Park, Na Liu, Nils Neuenkirchen, Qiaozhi Guo, Haifan Lin

**Table of Contents**

1. Supplementary Results p. 1
2. Supplementary Materials and Methods p. 2-3
3. Supplementary Figure Legends p. 4-6
4. Supplementary Figures p. 7-12
5. Supplementary Tables 1 and 2 p. 13-44
6. Supplementary References p. 45

**I. SUPPLEMENTARY RESULTS**

**Ovary transcriptome analysis**

In the ovary, we identified 195 genes up-regulated and 187 genes down-regulated upon reducing HP1a expression. 100 of 195 up-regulated genes (51.3%) were found to be bound by HP1a, while 78 of 187 down-regulated genes (41.7%) were identified to be associated with HP1a. The differentially regulated genes were enriched in metabolism functions and oogenesis. We also compared the HP1a-regulated genes in the ovary and embryo and found that HP1a regulates a quite different and larger set of genes in the embryo compare to that of the ovary—approximately 95% of HP1a-regulated genes in the embryo were not identified as differentially expressed in the ovary upon inducing HP1a RNAi.

**II. SUPPLEMENTARY MATERIALS AND METHODS**

## **Generation of EGFP-HP1A flies using CRISPR-Cas9**

*Generation of homology directed repair (HDR) construct for EGFP-HP1a knock-in*

A homology-directed repair donor construct that contains EGFP-HP1a sequence flanking the HP1a gRNA site (Supplementary Figure 5) was injected into the F1 progeny of transgenic HP1a gRNA fly crossed to a transgenic nanos-Cas9 line (BDSC stock #54591 for germline Cas9; BestGene company). The success rate of CRISPR-induced knock-in was 33.3%, with 6 out of 20 F2 progeny tested having positive EGFP-HP1a insertion (Supplementary Figure 6B). EGFP-HP1a insertion into the endogenous site was also confirmed via HP1a immunoblot, where the only detectable HP1a present in the knock-in line was shown to be EGFP-tagged (Supplementary Figure 6C). EGFP-HP1a expression was detected in all cell types, both somatic and germline cells in the ovary and in all stages of oogenesis (data not shown). EGFP-HP1a expression was also detected in all stages of embryogenesis (Supplementary Figure 6A). The survival and fertility rates of the EGFP-HP1a knock-in flies were comparable to those of wildtype flies, demonstrating full functionality of the inserted, tagged protein (Supplementary Figure 6D, E).

*Generation of transgenic HP1a gRNA line*

pCFD4-U6:1_U6:3tandemgRNAs (Addgene #49411)vector was used to clone HP1a gRNA using a protocol from CRISPR Fly design (Port *et al*. 2014). Using CRISPR Optimal Target Finder (<http://tools.flycrispr.molbio.wisc.edu/targetFinder/)>, we identified 88 CRISPR gRNA targets for HP1a and the sequence with the highest score was used for making the gRNA line. In order to prevent cleavage of template plasmid by gRNA-guided Cas9, the protospacer adjacent motif (PAM) sequence (in bold) AA**C** **CC**T was changed to AA**T CC**T. The NGG to NGT conversion results in a silent mutation, where asparagine is made for both codons AAC and AAT. Following primer was used to clone HP1a gRNA into the pCFD4-U6:1 vector.

gRNA__FOR: GGC AAG AAA ATC GAC AAT CCT GAG AGC TCG GCA AAG

gRNA__REV: CTT TGC CGA GCT CTC AGG ATT GTC GAT TTT CTT GCC

## **Generation of HP1a shRNA (RNAi) lines using the PhiC31 integrase method**

siRNA sequences against HP1a was predicted based on the Designer of Small Interfering RNA (DSIR) program generated by Vert et al. (Vert *et al*. 2006) (<http://biodev.extra.cea.fr/DSIR/DSIR.html)> and sequences with top two scores were cloned into Valium 22 vector according to a Cold Spring Harbor protocol (Chang *et al*. 2014). The cloned vectors were sent to BestGene company for injection and progeny carrying the *w+* marker was selected and balanced to maintain the transgenic HP1a shRNA lines. Efficiency of HP1a RNAi in both lines was tested using an immunoblot (Figure 1A) and HP1a RNAi #3 was not used in the study. Following primers were used for cloning HP1a shRNA sequences into Valium 22 vector:

HP1_2_TOP, ctagcagtAAGTGTAGATCTTATTTAATCtagttatattcaagcataTTAAATAAGATCTACACTTTAgcg

HP1_2_BOT, aattcgcAAGTGTAGATCTTATTTAATCtatgcttgaatataactaTTAAATAAGATCTACACTTTAactg

HP1_3_TOP, ctagcagtGGTGGAGTACTATCTGAAATGtagttatattcaagcataTTTCAGATAGTACTCCACCTGgcg

HP1_3_BOT, aattcgcGGTGGAGTACTATCTGAAATGtatgcttgaatataactaTTTCAGATAGTACTCCACCTGactg

pVAL22_FOR, GGTGATAGAGCCTGAACCAG

pVAL22_REV, TAATCGTGTGTGATGCCTACC

pVAL22_seq, GGTGATAGAGCCTGAACCAG

**III. SUPPLEMENTARY FIGURE LEGENDS**

##### **Supplementary Figure 1.** **Biological replicates used in maternal transcriptome analysis (RNA-seq) are highly correlated and reproducible.**

Reproducibility between biological replicates of each RNA-seq data are determined from Pearson correlation analysis and visualized in scatterplots. (A) HP1a RNAi #1, (B) EGFP RNAi #1, (C) HP1a RNAi #2, (D) EGFP RNAi #2. (C) and (D) show higher correlation than (A) and (B), indicating that RNAi #2 data were more highly reproducible. Volcano plots show the mRNA level changes for all genes in the (E) HP1a RNAi #1 and (F) HP1a RNAi #2 based on fold changes and p-values.

**Supplementary Figure 2. Schematics of transcriptome and ChIP-seq analyses pipeline.**

Pipelines for (A) maternal transcriptome and (B) ovary HP1a ChIP-seq analyses.

(A) Tophat was used for mapping reads from RNA-seq data, DE genes were identified using DeSeq, and GO analysis for DE genes was done through DAVID.

##### (B) Bowtie2 was used to map reads from ChIP-seq data, and SICER 1.1 was used for peak calling.

##### **Supplementary Figure 3. Optimization of sonication time for crosslinked nuclei.**

Lysate at sonication times 0, 3, 6, 9, and 12 minutes were taken out, reverse-crosslinked overnight, and purified DNA was run on an agarose gel to determine sonicated fragment sizes. All chromatin used in ChIP experiment were sonicated for 9 minutes.

**Supplementary Figure 4. HP1a RNAi induces a global change in epigenetic landscape.**

Ovaries from HP1a RNAi (HP1a RNAi #2 in the *Su(var)2-504* heterozygous background) and control females (*w1118*) were dissected and changes in the level of following histone modifications were characterized: H3K9me3 (reduced), H3K27me3 (reduced), H3K4me3 (increased), H4Ac (reduced), H2Av (increased). HP1a level was reduced in HP1a RNAi ovaries and GAPDH was used as a loading control.

**Supplementary Figure 5. pHD-DsRed-attP vector sequence with homology arms 1kb upstream and downstream from the gRNA site.**

NNN = pHD-DsRed-attP vector sequence

gaattc = ecoRI site

##### ctcgag = XhoI site

NNN = HP1a sequence

NNN = EGFP sequence

NNN = target site (gRNA)

cgg = PAM

NNN = 1kb homology arm 1 flanking the target site (genomic region to 5’end HP1a) ~1kb

NNN = 1kb homology arm 2 flanking the target site (rest of HP1a) 1035 bps

##### **Supplementary Figure 6. Validation of CRISPR-induced EGFP-HP1a knock-in.**

(A) Paternal zygotic copy of EGFP-HP1a is expressed in all stages of embryogenesis (b, c, d), after maternal to zygotic transition.

(B) Six out of twenty F2 progeny tested positive for correct EGFP-HP1a insertion.

(C) EGFP-HP1a insertion into the endogenous site was also confirmed via HP1a immunoblot. EGFP-HP1a as well as endogenous HP1a is detected in EGFP-HP1a/CyO flies, while EGFP-HP1a in the knock-in line was EGFP-tagged. Wildtype control shows a band at 25kDa, indicating endogenous HP1a, but not at ~50kDa, indicating EGFP-tagged HP1a.

Eggs laid by females were collected at days 2, 4, 6, 8, 10, 12 and eggs on at least three replicate plates were counted. The embryos were incubated at 25ºC and the hatch rate was calculated from counting the embryos that hatched after 30 hours.

(D) Egg deposition and (E) embryo hatch rates in the EGFP-HP1a knock-in flies are similar to those of wildtype flies.

**IV. SUPPLEMENTARY FIGURES**

**Supplementary Figure 1**


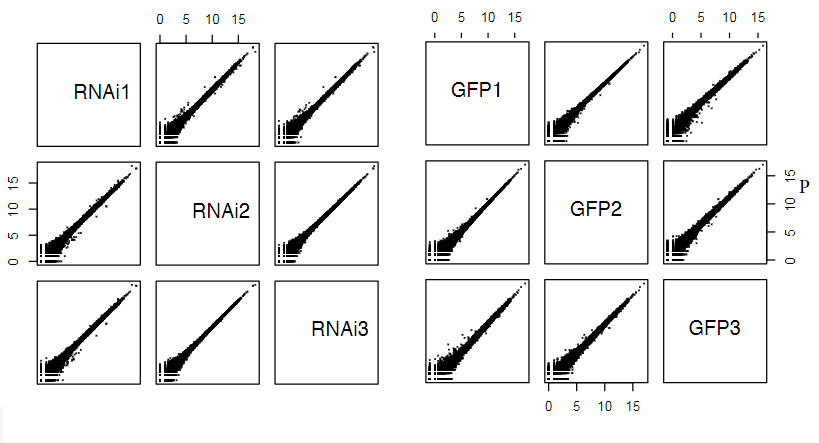

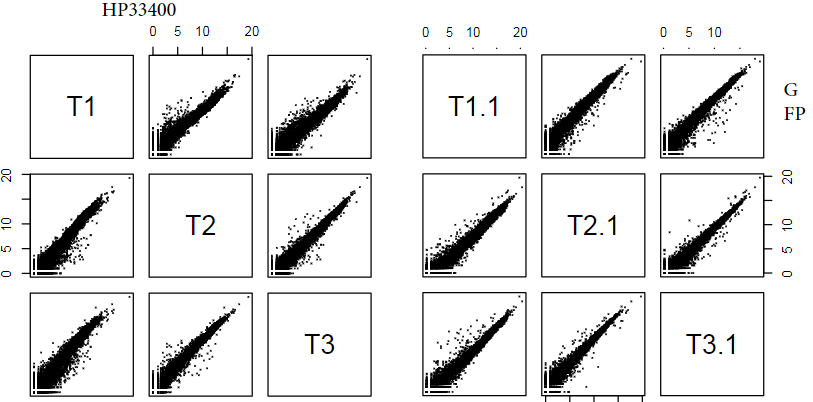


HP1a

RNAi #1

Rep. 1

HP1a

RNAi #1

Rep. 2

HP1a

RNAi #1

Rep. 3

EGFP

RNAi #1

Rep. 1

EGFP

RNAi #1

Rep. 2

EGFP

RNAi #1

Rep. 3

HP1a

RNAi #2

Rep. 1

HP1a

RNAi #2

Rep. 2

HP1a

RNAi #2

Rep. 3

EGFP

RNAi #2

Rep. 1

EGFP

RNAi #2

Rep. 2

EGFP

RNAi #2

Rep. 3

**A**

**B**

**C**

**D**


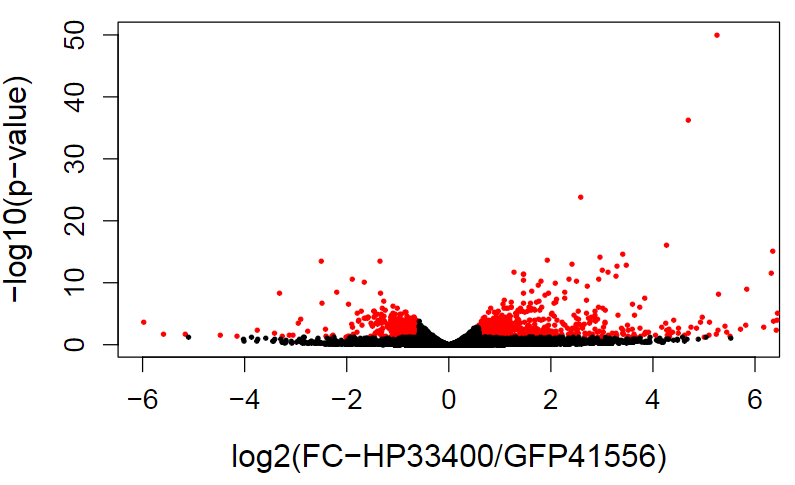

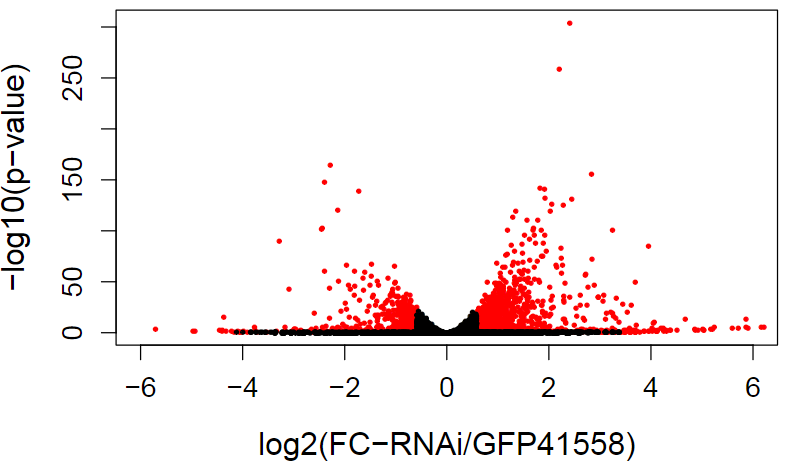


**E**

**F**

**Supplementary Figure 2**


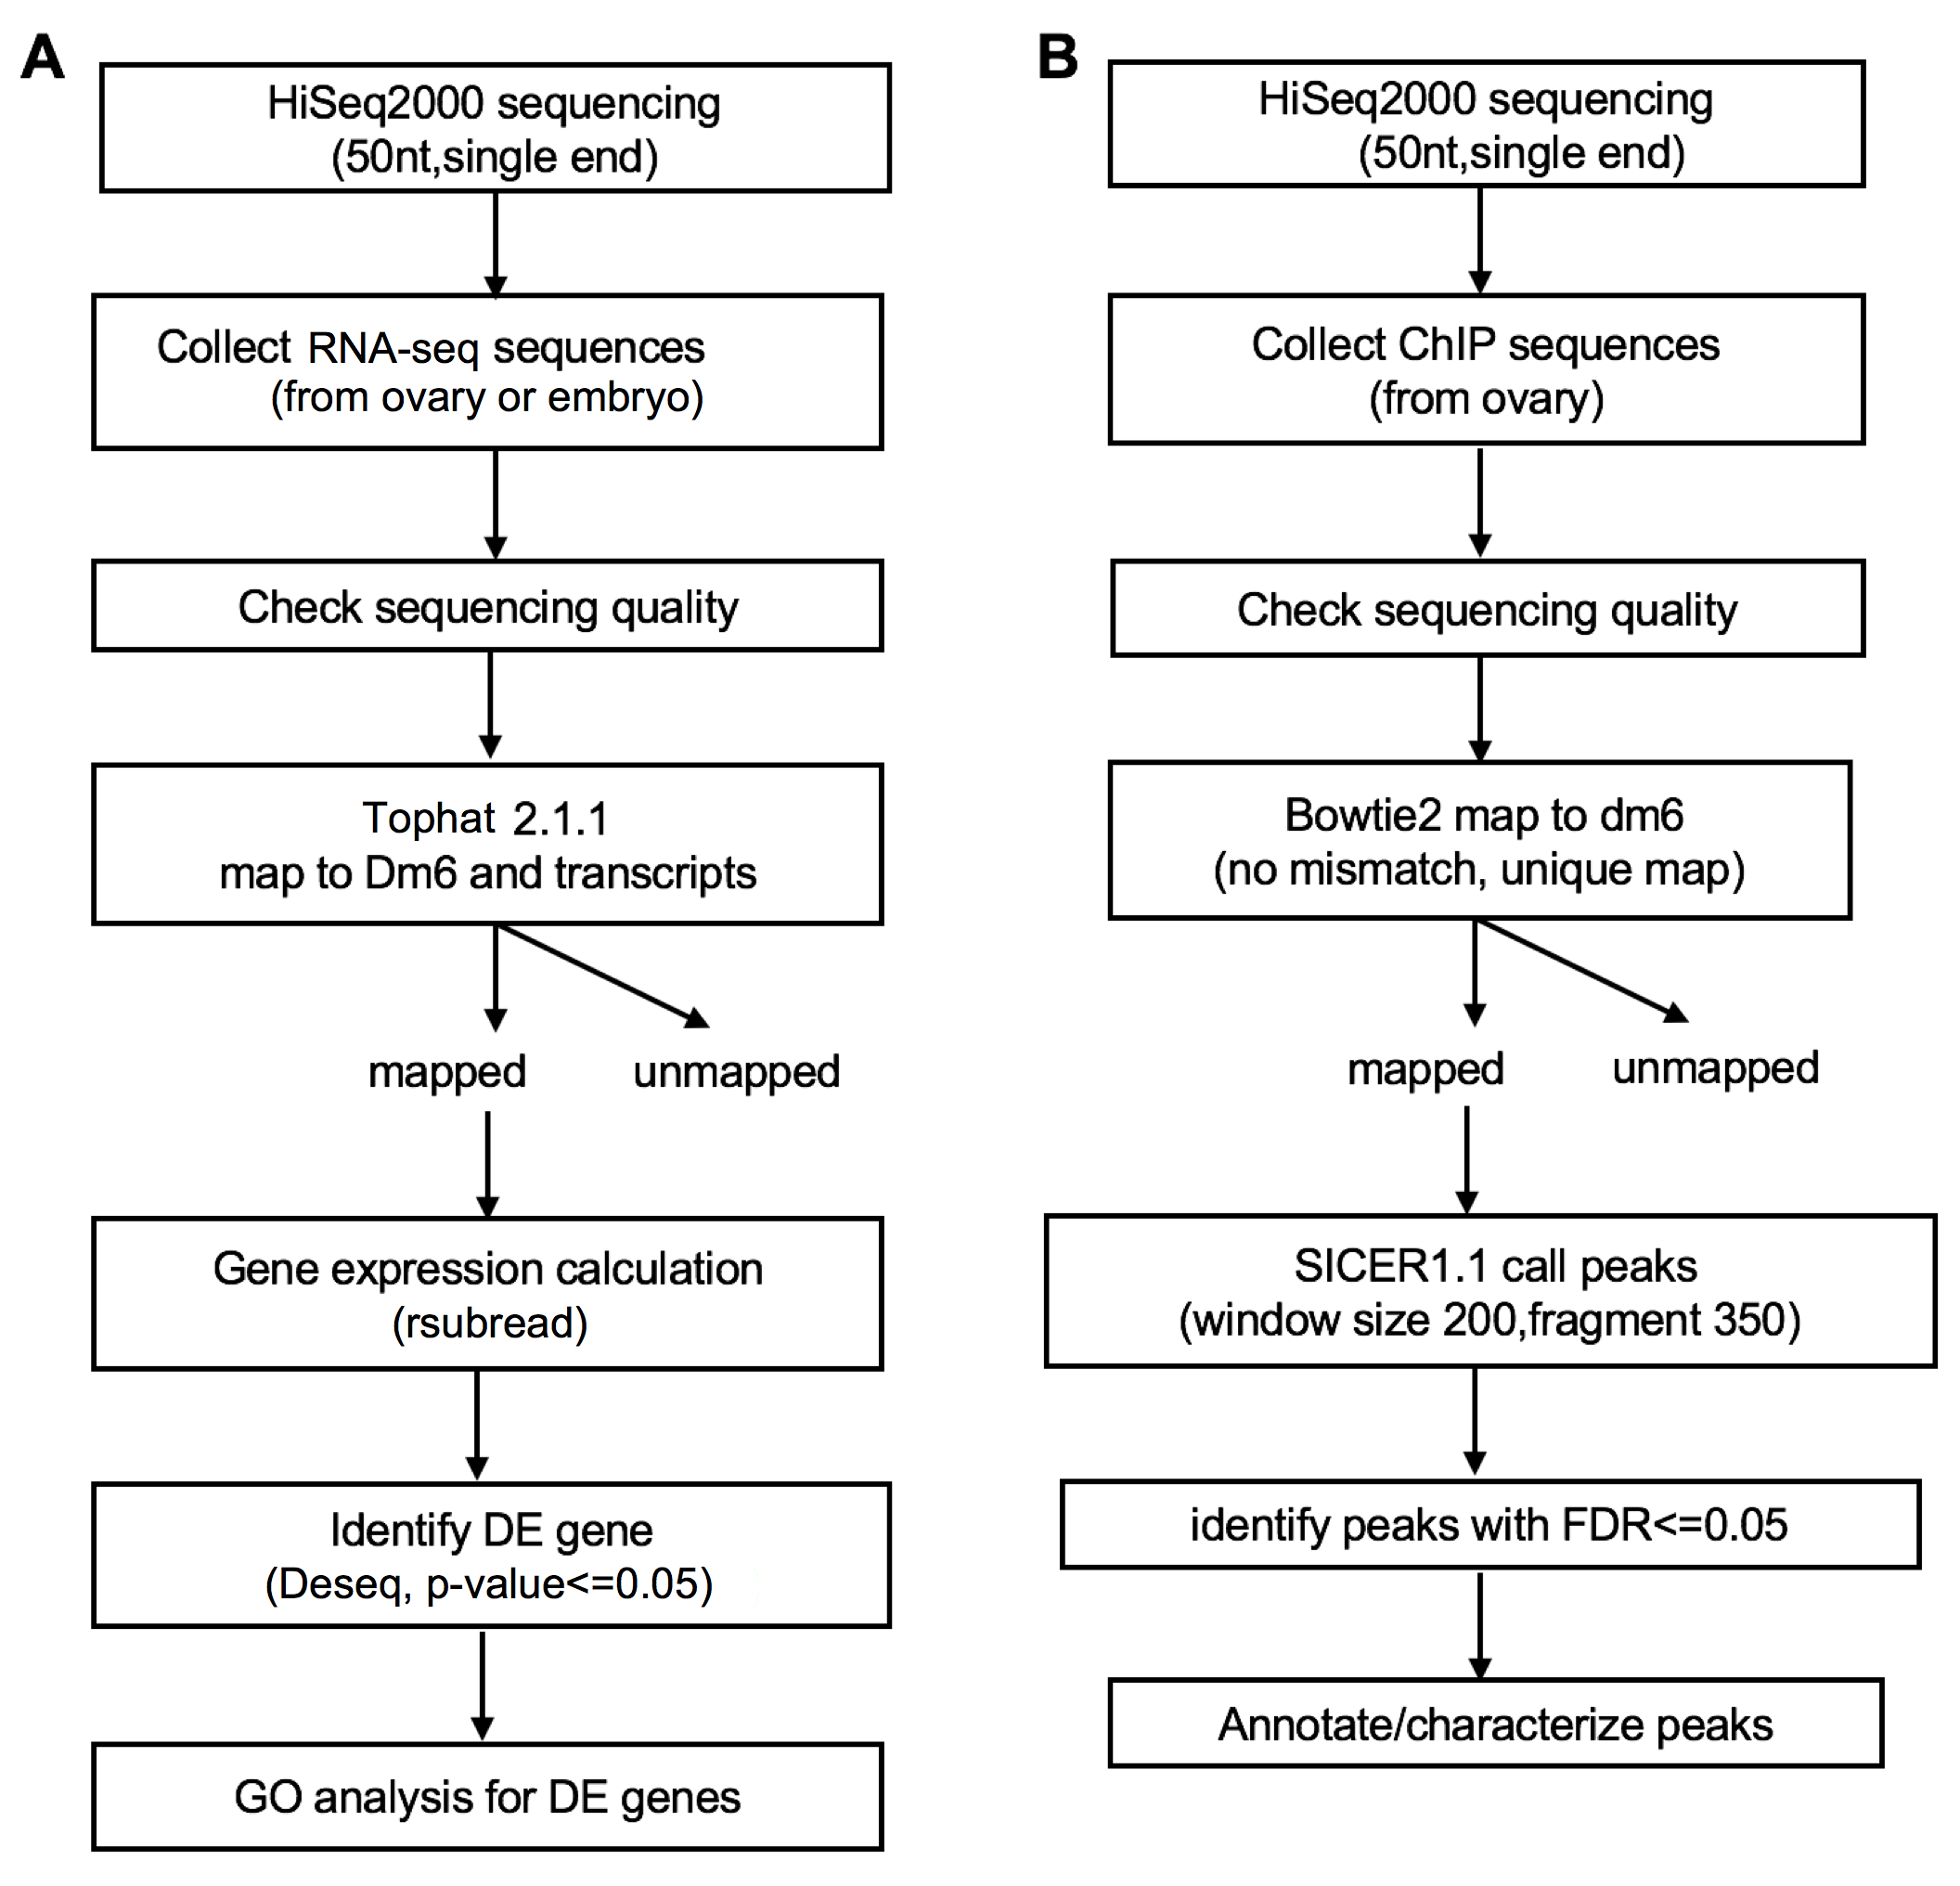


**Supplementary Figure 3**


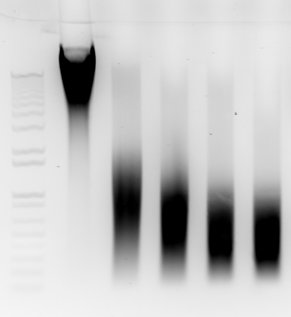


500

1000

100

12000

Sonication time (min): 0 3 6 9 12

**Supplementary Figure 4**

**
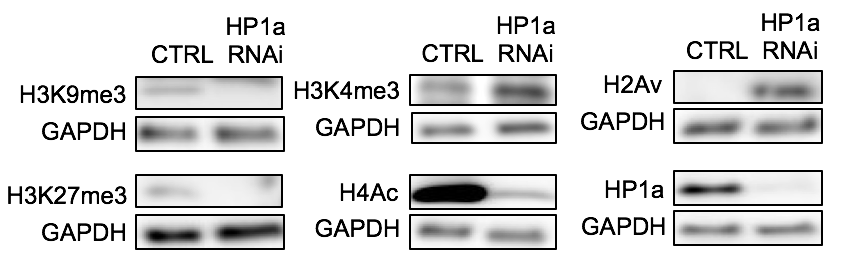
**

**Supplementary Figure 5**

GCCAGGCATCAAATAAAACGAAAGGCTCAGTCGAAAGACTGGGCCTTTCGCCCGGGCTAATTATGGGGTGTCGCCCTTCGCTGAAGCAGGTGgaattc**gttagtacatatggctacgacttagtttggc**atgtggatgaacttcaattaattctcgatcgcgcgggtgacttcttcggccacttcaaggagtttcttccattgaattaaagatagggagatgcccttcttgccgggaagaatttggccgcccttatcgtagaactctcgaatgtccaccgatttgcgaccgcggaactcgttgattcgcacctggcgaagtccttccagggtccaagatgtagcaccattttcgcccgaatcttttggatctgaatttggagcatcagattccttcgccttcttgcttgccggcttgatacgctgaaagaggttttaacttgttatacctagttttggtgtatttctagttaacttacatcatctggaccgctatcgctatctgaggacgaatccttcttctttgttttgggcatttttatagaatttccgtaaaacagaagaaacaaaacgcaaattgtcaaaaaattcgtgaatattcgcgcaacttattcagtgctgtgaaacgcgtcgataatagttgtggtacaacggattccttaatcgattcatcgatttattacaaaatttttaaaaacagatattggcgatcagttagttacgttattattatagttatgttgtaaaatttagatagttcttagtgttaacatttttctagacttaaaatgaaattaatacgatgtgcaaatctatcggaaaatagataagcgtagtcttagcagtccacgcgtactttcgcacactgttcggccggcgtcattttagaacgcgcatttttttgcagatttttcattttgtggaaagtcttctagcgccaacacacaggcttataaaaaccaatttagctgcgtgcataaagtgtagatcttatttaatctaggtgagccatgaaagcaaagagagtcgactaaaaatcgtactttcctttcgtactttgcgtgtgtgtgcggttgtgtgcggttgtgctaattctttccttattttttgtcgtgtgaagtattttaataaaaacaaaatggtgagcaagggcgaggagctgttcaccggggtggtgcccatcctggtcgagctggacggcgacgtaaacggccacaagttcagcgtgtccggcgagggcgagggcgatgccacctacggcaagctgaccctgaagttcatctgcaccaccggcaagctgcccgtgccctggcccaccctcgtgaccaccctgacctacggcgtgcagtgcttcagccgctaccccgaccacatgaagcagcacgacttcttcaagtccgccatgcccgaaggctacgtccaggagcgcaccatcttcttcaaggacgacggcaactacaagacccgcgccgaggtgaagttcgagggcgacaccctggtgaaccgcatcgagctgaagggcatcgacttcaaggaggacggcaacatcctggggcacaagctggagtacaactacaacagccacaacgtctatatcatggccgacaagcagaagaacggcatcaaggtgaacttcaagatccgccacaacatcgaggacggcagcgtgcagctcgccgaccactaccagcagaacacccccatcggcgacggccccgtgctgctgcccgacaaccactacctgagcacccagtccgccctgagcaaagaccccaacgagaagcgcgatcacatggtcctgctggagttcgtgaccgccgccgggatcact**ctcggcatggacgagctgtacaagatg**ggcaagaaaatcgacaatcctgagagctcggcaaaggtttccgatgccgaagaggaggaggaggagtacgccgtggaaaagatcatcgacaggcgggtgcgcaagggaaaggtgagttttccgaaccagacgtcccattatatttggtcctaaaacgccattttccacctgcaggtggagtactatctgaaatggaagggctatcccgaaactgagaacacgtgggagccggagaacaatctcgactgccaggatcttatccagcagtacgaggcgagccgcaaggatgaggtaagtgaagtacaatgcgatgccaagtacagttgtgcttgctaggatttcctttacatctcgtttcggtccgtaggagaagtcagccgcctccaagaaggatcgacccagcagcagcgccaaggccaaggaaactcaaggacgcgccagcagttcgacgtccacagcaagcaagcgaaagtccgaagaaccaacaggtaagctatggaattgagtgtacctacaaatattttctgtacacaaattggtataacaatagtcatcacctacaatatccactggcatttatttgcccttttcgtcaaaactgtattcacatatgtatctcaaattttgtccttcgcaagaatggcatgcgcaagaaaaagatggtctttgcaataaaaaaatgcatctattaaaaaattgcactgtattaattacttgtttttattttatttatttagcgccctctggcaataaatcaaaacgtaccacagatgcggagcaggacaccattcccgtttcaggatctaccggattcgatcgcggcctggaggccgaaaagatcttgggtgcctccgacaataatggccgcctgacattcctcattcagttcaaaggcgtggaccaagcagaaatggtgccctcctcagtggccaatgaaaaaatcccacgaatggtaatccacttctacgaagagcgcctatcctggtactctgataatgaagattaa  acagttggatcatcgaaagcgaaaaagaacgattatacatttaacgaaaaattacccacttagaattatagctccttgcaggcgctttcaaaaccacccaaccaactcttaaggcatcggacttttttccataaatgtccagagtcagtgtctgtatttatgataaccattttcaataaataaaaaaaacctttattctgctggagcctctcgagGCTCTTCCGTCAATCGAGTTCAAGGGCGACACAAAATTTATTCTAAATGCATAATAAATACTGATAA

**Supplementary Figure 6**


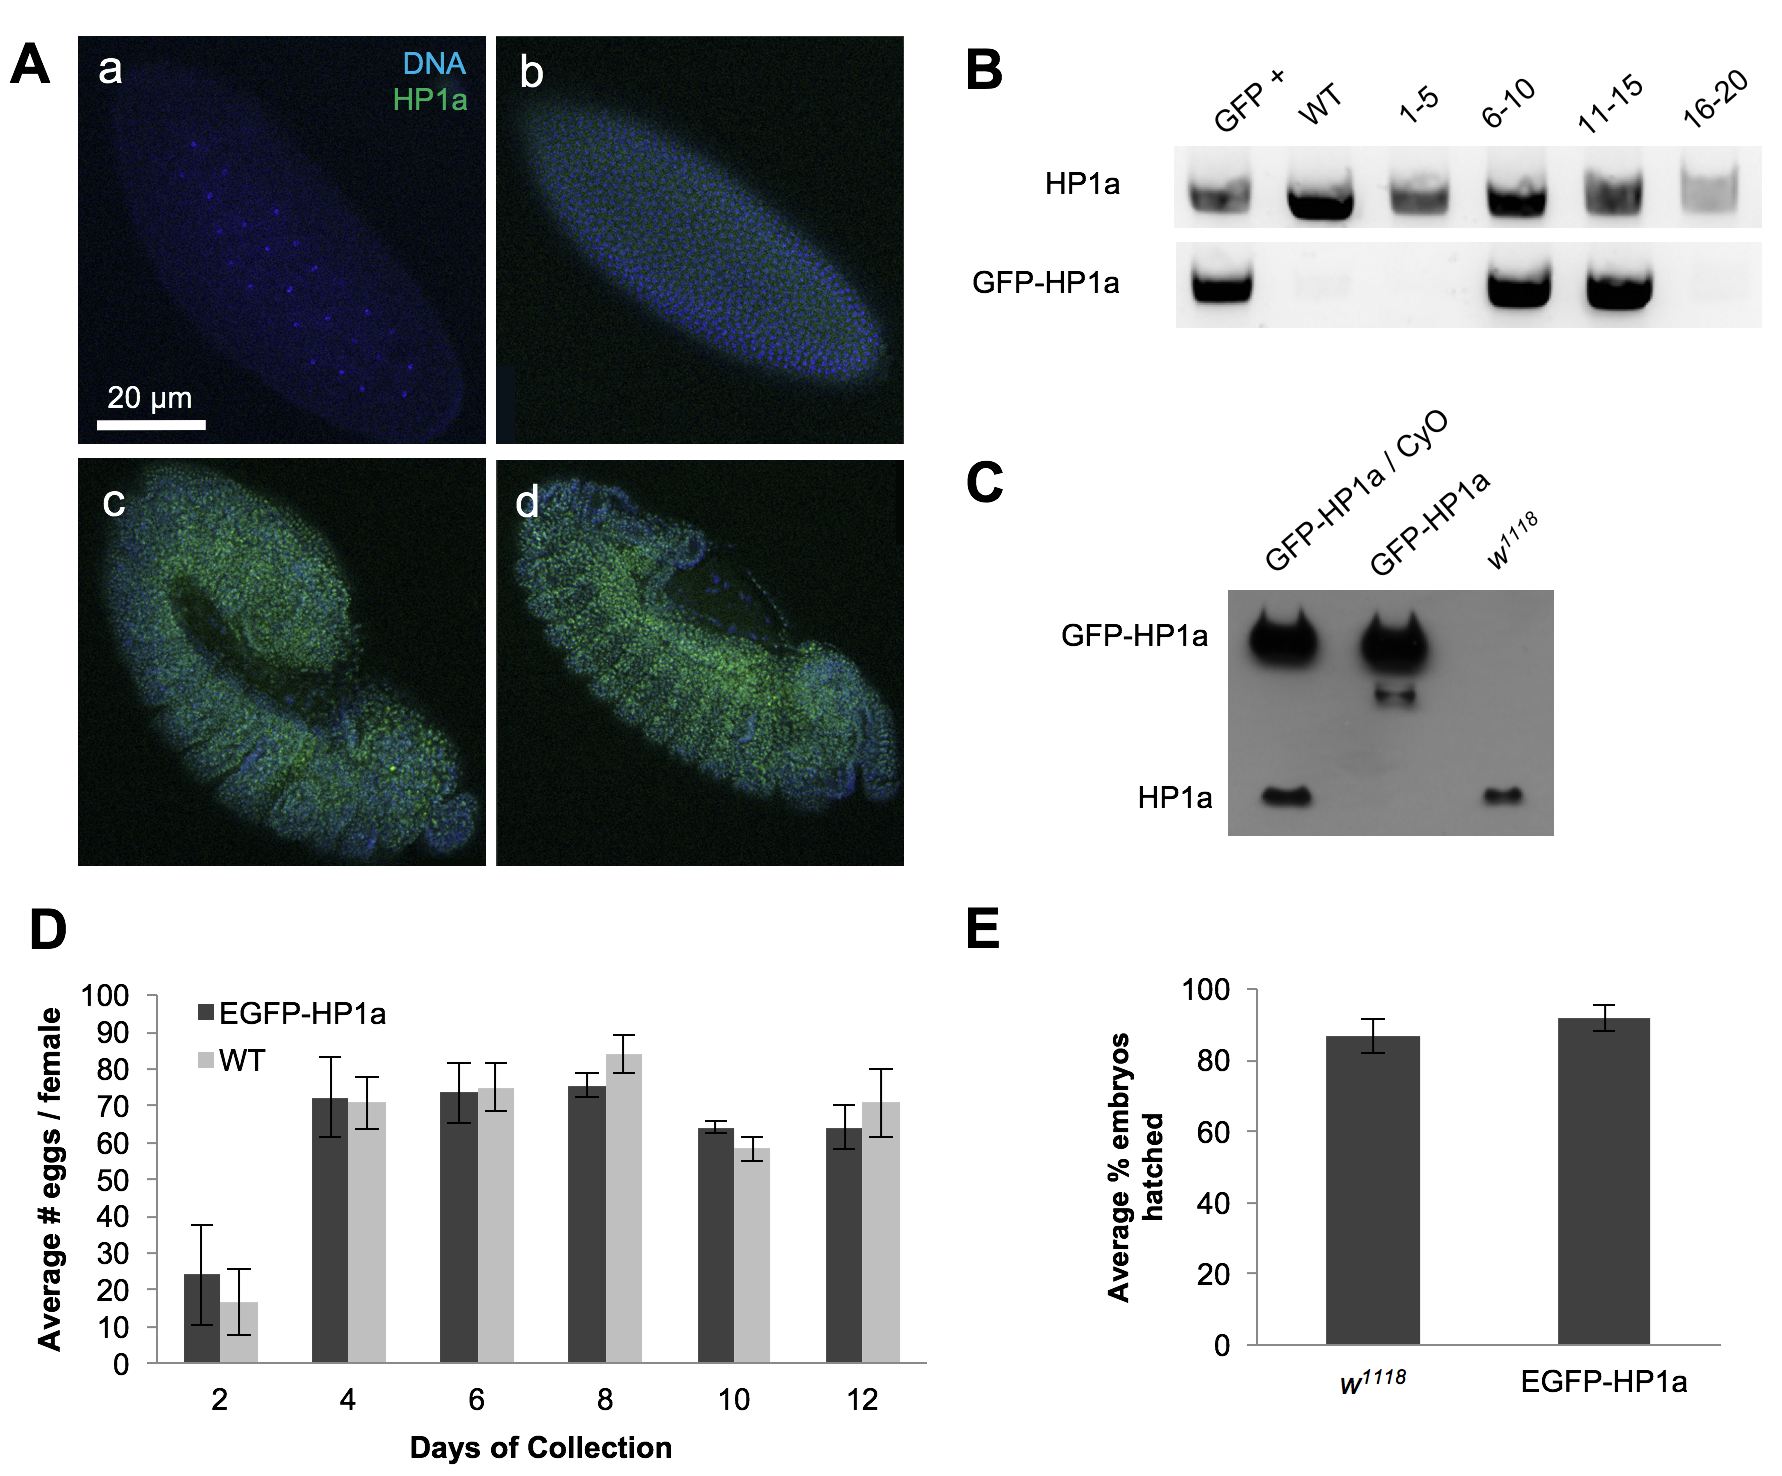


**V. SUPPLEMENTARY TABLE**

**Supplementary Table 1.** A summary of sequence read mapping rates to the *Drosophila* genome in maternal transcriptome and HP1a ChIP-seq analyses.

Maternal transcriptome analysis:

| Library Name | Raw reads | Mapped reads | Mapping rate |
| --- | --- | --- | --- |
| EGFP41556_rep1 | 65642916 | 63345117 | 0.965 |
| EGFP41556_rep2 | 13971666 | 13507937 | 0.967 |
| EGFP41556_rep3 | 17006146 | 16444254 | 0.967 |
| HP1a33400_rep1 | 20365156 | 17528734 | 0.861 |
| HP1a33400_rep2 | 16531866 | 14784662 | 0.894 |
| HP1a33400_rep3 | 21736727 | 20773947 | 0.956 |
| EGFP41558_rep1 | 16261261 | 15689594 | 0.965 |
| EGFP41558_rep2 | 9375197 | 9000211 | 0.960 |
| EGFP41588_rep3 | 7444948 | 6785202 | 0.911 |
| HP1aRNAi_rep1 | 20765513 | 20030970 | 0.965 |
| HP1aRNAi_rep2 | 20419420 | 19633963 | 0.962 |
| HP1aRNAi_rep3 | 21240090 | 20455008 | 0.963 |

HP1a ChIP analysis:

| Library Name | Raw reads | Mapped reads | Mapping rate |
| --- | --- | --- | --- |
| Rep1_HP1a ChIP | 51831789 | 47316267 | 0.913 |
| Rep1_Input | 77034656 | 43625300 | 0.566 |
| Rep2_HP1a ChIP | 32140314 | 29368841 | 0.914 |
| Rep2_Input | 10451179 | 7436011 | 0.711 |
| Rep3_HP1a ChIP | 33576065 | 30621403 | 0.912 |
| Rep3_Input | 58279959 | 38808008 | 0.666 |

**Supplementary Table 2.** 1359 differential expressed genes identified by mRNA-seq data.

| ID | name | log2FC in RNAi#2 | log2FC in RNAi#1 | boundbyHP1a(1 means bound, 0 means not bound) |
| --- | --- | --- | --- | --- |
| FBgn0003607 | Su(var)205 | -5.130080211 | -0.77771118 | 1 |
| FBgn0085201 | CG34172 | -3.76367524 | -3.125713758 | 1 |
| FBgn0052350 | CG32350 | -3.284028655 | -2.501021065 | 1 |
| FBgn0050440 | CG30440 | -3.088821053 | -3.317876671 | 1 |
| FBgn0030925 | Hayan | -2.858663411 | -2.952474231 | 1 |
| FBgn0085736 | CG40472 | -2.459659567 | -2.902730772 | 1 |
| FBgn0058196 | Maf1 | -2.453337822 | -1.656463141 | 1 |
| FBgn0250816 | AGO3 | -2.441433616 | -1.894325599 | 1 |
| FBgn0025726 | unc-13 | -2.39596484 | -1.47249403 | 1 |
| FBgn0025740 | PlexB | -2.393455818 | -1.245251562 | 1 |
| FBgn0039972 | CG17018 | -2.282014289 | -0.516013048 | 1 |
| FBgn0051032 | CR31032 | -2.160676198 | -0.717629447 | 0 |
| FBgn0025628 | CG4199 | -2.135558796 | -1.339531361 | 1 |
| FBgn0058263 | MFS17 | -2.118324161 | -0.977135849 | 1 |
| FBgn0036857 | CG9629 | -2.087680728 | -1.801238137 | 0 |
| FBgn0083987 | snRNA:U11 | -2.039746434 | -1.874951407 | 0 |
| FBgn0263093 | CR43361 | -2.001294167 | -2.197493315 | 1 |
| FBgn0015714 | Cyp6a17 | -1.987218564 | -0.532638484 | 1 |
| FBgn0032891 | Oseg5 | -1.889316015 | -0.93493209 | 0 |
| FBgn0030665 | CG15646 | -1.863614428 | -1.975248345 | 0 |
| FBgn0000826 | png | -1.803339299 | -1.460365312 | 1 |
| FBgn0029753 | CG4198 | -1.772936376 | -1.765278067 | 1 |
| FBgn0050046 | CG30046 | -1.751803661 | -2.76341426 | 0 |
| FBgn0011761 | dhd | -1.725903923 | -0.620806331 | 1 |
| FBgn0085638 | CG41378 | -1.708517152 | -1.127585871 | 1 |
| FBgn0032645 | CG15142 | -1.580781349 | -1.889338221 | 0 |
| FBgn0035085 | CG3770 | -1.559480322 | -0.855998065 | 1 |
| FBgn0262887 | CR43242 | -1.522342222 | -1.437649121 | 1 |
| FBgn0039993 | CG17691 | -1.502788099 | -0.841668607 | 1 |
| FBgn0266347 | nAChRalpha4 | -1.499503054 | -1.699637485 | 1 |
| FBgn0032889 | CG9331 | -1.478611397 | -0.889726513 | 1 |
| FBgn0030968 | CG7322 | -1.472999534 | -1.122577999 | 1 |
| FBgn0262124 | uex | -1.452462485 | -0.999812728 | 1 |
| FBgn0085453 | CG34424 | -1.350000788 | -1.398052529 | 0 |
| FBgn0031224 | CG11454 | -1.287346385 | -0.92524994 | 0 |
| FBgn0033836 | CG18278 | -1.28605306 | -1.966052848 | 0 |
| FBgn0027791 | O-fut2 | -1.258316691 | -1.793669426 | 0 |
| FBgn0039118 | CG10208 | -1.251713126 | -2.486031477 | 0 |
| FBgn0034985 | CG3328 | -1.251389664 | -1.467190457 | 0 |
| FBgn0037773 | CG5359 | -1.231455074 | -0.545765262 | 0 |
| FBgn0030945 | Ing3 | -1.214453488 | -1.768223061 | 1 |
| FBgn0029897 | RpL17 | -1.203535352 | -1.092814197 | 0 |
| FBgn0039665 | CG2310 | -1.170644225 | -1.00356471 | 0 |
| FBgn0033122 | CG17002 | -1.155032639 | -1.098694283 | 1 |
| FBgn0031022 | CG12204 | -1.142559542 | -1.505175109 | 1 |
| FBgn0261363 | PPO3 | -1.118575277 | -1.900143365 | 1 |
| FBgn0031418 | CG3609 | -1.112351363 | -1.095829832 | 0 |
| FBgn0010247 | Parp | -1.107221342 | -1.13630509 | 1 |
| FBgn0043001 | Chrac-16 | -1.10361656 | -0.380934592 | 0 |
| FBgn0267590 | CR45928 | -1.076434174 | -1.484434508 | 1 |
| FBgn0266569 | CG42259 | -1.075911005 | -0.809457311 | 1 |
| FBgn0004856 | Bx42 | -1.061893764 | -0.760990296 | 1 |
| FBgn0014269 | prod | -1.057230055 | -0.490290931 | 1 |
| FBgn0030974 | CG7358 | -1.04925682 | -1.203476715 | 0 |
| FBgn0033431 | CG1827 | -1.035634638 | -1.385129205 | 1 |
| FBgn0033799 | GLaz | -1.029912787 | -1.119464254 | 0 |
| FBgn0034406 | Jheh3 | -1.021422285 | -0.530969579 | 1 |
| FBgn0022338 | dnk | -1.019957738 | -0.838914001 | 0 |
| FBgn0034997 | CG3376 | -1.004132242 | -0.639092176 | 0 |
| FBgn0030737 | CG9914 | -0.989829885 | -1.522888089 | 0 |
| FBgn0259247 | laccase2 | -0.985836649 | -1.159509894 | 1 |
| FBgn0024998 | CG2685 | -0.981044066 | -0.525203219 | 0 |
| FBgn0005585 | Crc | -0.958351574 | -0.747133871 | 1 |
| FBgn0260986 | mei-38 | -0.950708447 | -0.553577481 | 1 |
| FBgn0013764 | Chi | -0.945607937 | -1.149468511 | 0 |
| FBgn0031117 | GstT3 | -0.941464847 | -0.75887322 | 0 |
| FBgn0027950 | MBD-like | -0.939795613 | -0.931652298 | 0 |
| FBgn0051388 | CG31388 | -0.935954558 | -0.564792227 | 0 |
| FBgn0034878 | pita | -0.933239994 | -0.992871166 | 0 |
| FBgn0263355 | CG31688 | -0.930257894 | -0.614071341 | 1 |
| FBgn0039459 | IntS12 | -0.92362831 | -0.818827954 | 0 |
| FBgn0031980 | RpL36A | -0.92320542 | -0.642778487 | 0 |
| FBgn0085208 | CG34179 | -0.919078626 | -0.735521431 | 0 |
| FBgn0029161 | slmo | -0.910998046 | -0.706017914 | 0 |
| FBgn0029854 | CG3566 | -0.908350195 | -0.642842648 | 0 |
| FBgn0035160 | hng3 | -0.90492241 | -0.651364887 | 0 |
| FBgn0015621 | Clp | -0.901860439 | -0.778413703 | 0 |
| FBgn0003093 | Pkc98E | -0.89995223 | -0.737185139 | 0 |
| FBgn0032812 | Hakai | -0.894782808 | -1.333585609 | 1 |
| FBgn0039013 | CG4813 | -0.893558914 | -1.053831041 | 0 |
| FBgn0037156 | CG11523 | -0.889605533 | -0.665107593 | 1 |
| FBgn0021765 | scu | -0.882164651 | -1.019876385 | 1 |
| FBgn0034876 | wmd | -0.882058368 | -0.424811106 | 1 |
| FBgn0265532 | CR44382 | -0.881123606 | -1.034599252 | 1 |
| FBgn0032775 | CG17544 | -0.879567886 | -1.465249114 | 0 |
| FBgn0004587 | B52 | -0.879211543 | -0.577323883 | 1 |
| FBgn0015721 | ktub | -0.878897132 | -0.922968272 | 0 |
| FBgn0250814 | CG4169 | -0.872926209 | -1.657114778 | 1 |
| FBgn0036728 | CG7580 | -0.871952376 | -0.778776423 | 1 |
| FBgn0031740 | CG7239 | -0.869716019 | -0.648777061 | 1 |
| FBgn0015828 | TfIIEalpha | -0.86864352 | -0.598714475 | 0 |
| FBgn0025286 | RpL31 | -0.867307375 | -0.785753724 | 1 |
| FBgn0035753 | RpL18 | -0.865250702 | -0.591186789 | 0 |
| FBgn0050410 | Rpi | -0.865032794 | -1.314837719 | 1 |
| FBgn0031781 | Arpc4 | -0.853258076 | -0.643371269 | 0 |
| FBgn0019624 | CoVa | -0.852099431 | -0.79491229 | 0 |
| FBgn0041186 | Slbp | -0.84959668 | -0.581443952 | 0 |
| FBgn0001197 | His2Av | -0.8481268 | -0.450700702 | 0 |
| FBgn0030093 | dalao | -0.847243245 | -0.753120464 | 0 |
| FBgn0000533 | ea | -0.834316272 | -0.804802725 | 1 |
| FBgn0024285 | Srp54 | -0.834313028 | -0.642379054 | 0 |
| FBgn0036648 | CG4098 | -0.826898474 | -0.658725373 | 0 |
| FBgn0026373 | RpII33 | -0.824270053 | -0.851676018 | 0 |
| FBgn0031312 | Tango14 | -0.819471821 | -0.820498153 | 0 |
| FBgn0000520 | dwg | -0.819247816 | -1.12791102 | 1 |
| FBgn0031106 | Syx16 | -0.818614161 | -1.497735981 | 1 |
| FBgn0031381 | Npc2a | -0.818009961 | -1.259235123 | 0 |
| FBgn0037328 | RpL35A | -0.816980688 | -1.334072622 | 0 |
| FBgn0004401 | Pep | -0.815611374 | -0.803494177 | 1 |
| FBgn0261602 | RpL8 | -0.815472697 | -1.631018384 | 1 |
| FBgn0030468 | CG1622 | -0.815242174 | -0.552575988 | 0 |
| FBgn0011715 | Snr1 | -0.814104636 | -0.902232576 | 0 |
| FBgn0261385 | scra | -0.811539762 | -0.915947731 | 0 |
| FBgn0024841 | Pcd | -0.810690379 | -0.770383752 | 0 |
| FBgn0086355 | Tpi | -0.803872006 | -1.297976653 | 1 |
| FBgn0030658 | CG7872 | -0.80128583 | -0.790831889 | 1 |
| FBgn0034645 | CG10320 | -0.798652581 | -1.08431129 | 0 |
| FBgn0000808 | gd | -0.792461556 | -0.433583547 | 1 |
| FBgn0033081 | geminin | -0.787250208 | -0.757798051 | 1 |
| FBgn0036825 | RpL26 | -0.779361127 | -1.308362302 | 0 |
| FBgn0026713 | l(1)G0007 | -0.779052059 | -1.334634467 | 0 |
| FBgn0000084 | AnxB10 | -0.776001574 | -1.123381619 | 1 |
| FBgn0036365 | CG10732 | -0.77296549 | -0.679272003 | 0 |
| FBgn0031263 | CG2789 | -0.772709918 | -1.593017918 | 0 |
| FBgn0030365 | Tango4 | -0.769116203 | -0.99874627 | 0 |
| FBgn0036298 | nst | -0.76533218 | -0.638737089 | 0 |
| FBgn0010078 | RpL23 | -0.765248861 | -0.849058176 | 1 |
| FBgn0020545 | kraken | -0.765078552 | -1.059467057 | 0 |
| FBgn0022023 | eIF-3p40 | -0.764787494 | -0.466669513 | 0 |
| FBgn0019637 | Atu | -0.760091779 | -0.704695406 | 1 |
| FBgn0000927 | fs(1)Ya | -0.759092057 | -1.718208431 | 1 |
| FBgn0028969 | deltaCOP | -0.754263755 | -0.46320039 | 1 |
| FBgn0005696 | DNApol-alpha73 | -0.754247041 | -0.561287178 | 0 |
| FBgn0037686 | RpL34b | -0.748854662 | -1.010052288 | 1 |
| FBgn0260991 | Incenp | -0.747868887 | -1.082137603 | 0 |
| FBgn0001091 | Gapdh1 | -0.739869328 | -1.093364954 | 0 |
| FBgn0039601 | CG1523 | -0.737109786 | -0.519533065 | 1 |
| FBgn0035370 | Non2 | -0.734887637 | -0.555276 | 1 |
| FBgn0024509 | Sec13 | -0.734693481 | -1.04019643 | 1 |
| FBgn0030316 | CG11695 | -0.730138029 | -0.890264624 | 1 |
| FBgn0036919 | Grasp65 | -0.729246944 | -1.129900901 | 1 |
| FBgn0038675 | CG6013 | -0.728818852 | -0.617658604 | 0 |
| FBgn0032833 | CoIV | -0.72777454 | -0.700497219 | 0 |
| FBgn0039581 | Moca-cyp | -0.725277068 | -0.680342335 | 1 |
| FBgn0028837 | CSN6 | -0.720983046 | -0.548173839 | 0 |
| FBgn0261609 | eIF-2alpha | -0.719233563 | -0.506896327 | 1 |
| FBgn0037312 | CG11999 | -0.716978784 | -1.138198443 | 1 |
| FBgn0040660 | CG13551 | -0.710973898 | -0.980609703 | 1 |
| FBgn0034704 | CG6758 | -0.709777317 | -0.627910346 | 1 |
| FBgn0024973 | CG2701 | -0.709467848 | -0.977184152 | 1 |
| FBgn0265184 | CG44249 | -0.706446052 | -0.620720824 | 0 |
| FBgn0014869 | Pglym78 | -0.705907234 | -0.998167444 | 0 |
| FBgn0015805 | Rpd3 | -0.705821849 | -0.381413772 | 1 |
| FBgn0000221 | brn | -0.705774469 | -0.698571671 | 1 |
| FBgn0000318 | cl | -0.70488898 | -0.604813622 | 0 |
| FBgn0036734 | CG7564 | -0.702486789 | -1.007684957 | 0 |
| FBgn0037270 | CG9769 | -0.701237312 | -0.869203001 | 1 |
| FBgn0030314 | CG11696 | -0.700427593 | -0.659179395 | 1 |
| FBgn0033845 | mars | -0.695915259 | -0.719097674 | 0 |
| FBgn0010391 | Gtp-bp | -0.694826535 | -1.072058213 | 1 |
| FBgn0035713 | velo | -0.694209689 | -0.827871536 | 0 |
| FBgn0022702 | Cht2 | -0.691784234 | -1.353133624 | 1 |
| FBgn0265574 | Cdc5 | -0.69104431 | -0.844966957 | 0 |
| FBgn0033716 | Den1 | -0.68957429 | -0.454206379 | 1 |
| FBgn0052533 | CG32533 | -0.689371261 | -1.06294729 | 1 |
| FBgn0038768 | CG4936 | -0.681089435 | -0.819801212 | 1 |
| FBgn0035035 | CG3570 | -0.680318762 | -0.741129239 | 0 |
| FBgn0011289 | TfIIA-L | -0.679685765 | -0.611873593 | 0 |
| FBgn0261597 | RpS26 | -0.679431547 | -0.94288147 | 1 |
| FBgn0011272 | RpL13 | -0.678062377 | -0.857376593 | 0 |
| FBgn0033566 | CG18004 | -0.677481401 | -0.858634792 | 0 |
| FBgn0010441 | pll | -0.675976985 | -0.657267025 | 0 |
| FBgn0037255 | Fip1 | -0.67577365 | -0.62799467 | 1 |
| FBgn0052537 | CG32537 | -0.674982571 | -0.769567638 | 0 |
| FBgn0030053 | CG12081 | -0.673137654 | -0.629612554 | 1 |
| FBgn0025864 | Crag | -0.671993803 | -0.699468488 | 0 |
| FBgn0029778 | RhoGAP5A | -0.670802304 | -0.714206039 | 1 |
| FBgn0037655 | CG11984 | -0.669663234 | -0.541909672 | 1 |
| FBgn0261119 | Prp19 | -0.66814942 | -0.541233517 | 0 |
| FBgn0002924 | ncd | -0.665917916 | -0.9496493 | 0 |
| FBgn0031021 | CG12203 | -0.665324838 | -0.937774468 | 1 |
| FBgn0027497 | Madm | -0.664053656 | -0.682800929 | 0 |
| FBgn0030012 | CG18262 | -0.663473775 | -0.999986518 | 1 |
| FBgn0035140 | CG17180 | -0.660639227 | -0.9326981 | 0 |
| FBgn0030648 | CG6340 | -0.659647285 | -0.815122092 | 1 |
| FBgn0030241 | feo | -0.657578051 | -1.022452778 | 0 |
| FBgn0033570 | CG7712 | -0.652082213 | -0.754795337 | 1 |
| FBgn0040227 | eIF-3p66 | -0.651817667 | -0.695025245 | 0 |
| FBgn0027889 | ball | -0.650969448 | -0.470993115 | 0 |
| FBgn0011640 | lark | -0.649890185 | -0.709263024 | 0 |
| FBgn0005655 | PCNA | -0.64964388 | -0.732878815 | 0 |
| FBgn0003462 | Sod | -0.647779577 | -0.850745102 | 0 |
| FBgn0266670 | Sec5 | -0.646599243 | -0.565661095 | 0 |
| FBgn0002174 | l(2)tid | -0.644614811 | -0.948032322 | 0 |
| FBgn0035878 | CG7182 | -0.644552595 | -0.72527469 | 0 |
| FBgn0004403 | RpS14a | -0.644084385 | -0.669549888 | 1 |
| FBgn0030530 | jub | -0.643553844 | -0.751343784 | 1 |
| FBgn0035181 | CG9205 | -0.642779164 | -1.07155732 | 0 |
| FBgn0029861 | CG3815 | -0.640296382 | -0.91738389 | 0 |
| FBgn0014028 | SdhB | -0.637822659 | -0.795257516 | 1 |
| FBgn0030943 | CG6540 | -0.630036034 | -0.665336283 | 1 |
| FBgn0250785 | vari | -0.629820544 | -1.306621959 | 1 |
| FBgn0010409 | RpL18A | -0.629672013 | -0.711161253 | 1 |
| FBgn0000117 | arm | -0.629586934 | -0.589191706 | 0 |
| FBgn0030500 | Ndc80 | -0.627433497 | -0.494724229 | 0 |
| FBgn0014029 | 2-Sep | -0.625743736 | -0.738415035 | 0 |
| FBgn0031093 | CG9581 | -0.625682915 | -1.428121458 | 0 |
| FBgn0050054 | CG30054 | -0.625417294 | -0.438270963 | 0 |
| FBgn0030292 | CG11752 | -0.625052078 | -0.767786511 | 1 |
| FBgn0033309 | CG8735 | -0.62311747 | -0.52065567 | 1 |
| FBgn0011020 | Sas-4 | -0.622339188 | -0.657732639 | 0 |
| FBgn0037024 | CG4365 | -0.619513686 | -0.885171548 | 0 |
| FBgn0030240 | CG2202 | -0.61498046 | -0.685217205 | 0 |
| FBgn0033178 | CG11127 | -0.614738602 | -0.465934933 | 0 |
| FBgn0037329 | CG12162 | -0.613687489 | -1.030600261 | 0 |
| FBgn0038046 | CG5641 | -0.613111714 | -0.786077482 | 1 |
| FBgn0021906 | RFeSP | -0.608755449 | -1.10896364 | 0 |
| FBgn0031020 | Nat1 | -0.608026518 | -0.684320726 | 1 |
| FBgn0013954 | FK506-bp2 | -0.607800231 | -0.531333823 | 0 |
| FBgn0033341 | MrgBP | -0.606922143 | -1.151889283 | 1 |
| FBgn0046685 | Wsck | -0.606916298 | -0.573343566 | 0 |
| FBgn0036815 | HipHop | -0.606562314 | -0.408784351 | 0 |
| FBgn0040394 | CG16903 | -0.605930953 | -0.729648671 | 0 |
| FBgn0030447 | CG2200 | -0.605568386 | -0.670119764 | 0 |
| FBgn0051365 | CG31365 | -0.604068844 | -0.395856169 | 0 |
| FBgn0030571 | CG14414 | -0.599763599 | -0.627001087 | 0 |
| FBgn0039559 | Mes-4 | -0.599309522 | -0.778079476 | 1 |
| FBgn0037621 | M1BP | -0.599091361 | -0.71813553 | 0 |
| FBgn0031066 | CoVIb | -0.598217985 | -0.421527131 | 1 |
| FBgn0032934 | CG8679 | -0.598077658 | -0.485791731 | 0 |
| FBgn0038619 | CG7685 | -0.597916386 | -0.606000451 | 0 |
| FBgn0011704 | RnrS | -0.591576147 | -0.51906307 | 0 |
| FBgn0031148 | Cbs | -0.591343765 | -0.866365947 | 1 |
| FBgn0037351 | RpL13A | -0.590350804 | -1.16410521 | 1 |
| FBgn0039733 | CG11504 | -0.588430547 | -0.860186129 | 0 |
| FBgn0250906 | Pgk | -0.587351052 | -0.827408788 | 1 |
| FBgn0267487 | Ptp61F | -0.586827745 | -0.543507368 | 1 |
| FBgn0036710 | CG6479 | -0.585201888 | -0.44149502 | 0 |
| FBgn0017566 | ND75 | -0.540067496 | -1.440728176 | 0 |
| FBgn0034753 | CG2852 | -0.487677847 | -1.400797835 | 0 |
| FBgn0028990 | Spn27A | -0.561205643 | -1.350048623 | 1 |
| FBgn0003279 | RpL4 | -0.509804516 | -1.325441209 | 0 |
| FBgn0033978 | Cyp6a23 | -0.496807468 | -1.317620222 | 1 |
| FBgn0000150 | awd | -0.267177826 | -1.287650929 | 1 |
| FBgn0003887 | betaTub56D | -0.567489017 | -1.276699601 | 1 |
| FBgn0033879 | CG6543 | -0.339358035 | -1.267794346 | 1 |
| FBgn0033961 | CG12859 | -0.407382238 | -1.264954703 | 1 |
| FBgn0038043 | CG17202 | -0.530720828 | -1.209056005 | 1 |
| FBgn0039635 | CG11876 | -0.411711694 | -1.202058796 | 0 |
| FBgn0029912 | CG4557 | -0.520617751 | -1.157748601 | 0 |
| FBgn0083961 | CG34125 | -0.292194481 | -1.136774853 | 1 |
| FBgn0028499 | CG7985 | -0.460036702 | -1.130734484 | 1 |
| FBgn0039110 | RanBP3 | -0.29811128 | -1.106795792 | 0 |
| FBgn0039697 | CG7834 | -0.501646288 | -1.105944941 | 0 |
| FBgn0028577 | pUf68 | -0.206513547 | -1.095609015 | 0 |
| FBgn0004867 | RpS2 | -0.507089435 | -1.076736922 | 1 |
| FBgn0014857 | His3.3A | -0.364919446 | -1.076151873 | 0 |
| FBgn0020261 | pcm | -0.515874068 | -1.073635099 | 1 |
| FBgn0045862 | btz | -0.492297722 | -1.067180139 | 0 |
| FBgn0026372 | RpL23A | -0.427074747 | -1.058980913 | 0 |
| FBgn0039713 | RpS8 | -0.576041321 | -1.056284811 | 1 |
| FBgn0040931 | CG9034 | -0.440376741 | -1.049648348 | 1 |
| FBgn0027785 | NP15.6 | -0.394834669 | -1.048933208 | 0 |
| FBgn0040477 | cid | -0.583552949 | -1.037049495 | 0 |
| FBgn0020618 | Rack1 | -0.17471754 | -1.014089917 | 0 |
| FBgn0016120 | ATPsyn-d | -0.446305189 | -1.012919816 | 0 |
| FBgn0003517 | sta | -0.240285142 | -1.010608628 | 1 |
| FBgn0035267 | CG13921 | -0.493963074 | -1.003012995 | 0 |
| FBgn0038948 | PSR | -0.578493837 | -1.000870835 | 0 |
| FBgn0024984 | CG3457 | -0.334463769 | -0.998260447 | 0 |
| FBgn0034796 | CG3700 | -0.54457411 | -0.987463624 | 0 |
| FBgn0030640 | CG6294 | -0.388568782 | -0.972864532 | 0 |
| FBgn0030641 | CG6299 | -0.388568782 | -0.972864532 | 0 |
| FBgn0036354 | Poc1 | -0.482016033 | -0.972774194 | 0 |
| FBgn0030638 | CG11655 | -0.541498469 | -0.96789308 | 1 |
| FBgn0026015 | Top3beta | -0.46981272 | -0.963930864 | 0 |
| FBgn0029857 | wuho | -0.523849106 | -0.961216233 | 0 |
| FBgn0039664 | CG2006 | -0.55934601 | -0.960671062 | 0 |
| FBgn0000579 | Eno | -0.437947467 | -0.957223555 | 0 |
| FBgn0039562 | Gp93 | -0.47724902 | -0.954717499 | 1 |
| FBgn0026239 | gukh | -0.275210948 | -0.949909658 | 0 |
| FBgn0013548 | l(2)dtl | -0.453686713 | -0.943358336 | 0 |
| FBgn0035294 | Mfap1 | -0.458767916 | -0.94138832 | 0 |
| FBgn0025352 | Thiolase | -0.38797505 | -0.937033347 | 1 |
| FBgn0023540 | CG3630 | -0.420417502 | -0.933625257 | 0 |
| FBgn0038271 | CG3731 | -0.547403025 | -0.930824479 | 0 |
| FBgn0029858 | CG15896 | -0.322239187 | -0.92953626 | 0 |
| FBgn0008635 | betaCOP | -0.569047672 | -0.928680507 | 0 |
| FBgn0031070 | CG12702 | -0.335297596 | -0.924471611 | 0 |
| FBgn0011211 | blw | -0.399317876 | -0.921673752 | 1 |
| FBgn0030631 | CG6227 | -0.448366957 | -0.919150183 | 1 |
| FBgn0020653 | Trxr-1 | -0.335000278 | -0.912006682 | 0 |
| FBgn0262559 | Mdh2 | -0.368283548 | -0.911459464 | 1 |
| FBgn0031497 | CG17259 | -0.383584558 | -0.91078608 | 0 |
| FBgn0027868 | Nup107 | -0.29833337 | -0.909075536 | 1 |
| FBgn0042712 | HBS1 | -0.341452289 | -0.905216368 | 1 |
| FBgn0039212 | Syx18 | -0.369758979 | -0.901235199 | 0 |
| FBgn0000482 | dor | -0.298002175 | -0.894992592 | 0 |
| FBgn0038277 | RpS5b | -0.429607047 | -0.893849942 | 0 |
| FBgn0020626 | Osbp | -0.268827157 | -0.89087121 | 0 |
| FBgn0031078 | Nup205 | -0.201546405 | -0.890503092 | 1 |
| FBgn0025742 | mtm | -0.388314282 | -0.890136567 | 0 |
| FBgn0027500 | spd-2 | -0.218518394 | -0.886712422 | 0 |
| FBgn0035811 | CG12262 | -0.314896644 | -0.884041111 | 0 |
| FBgn0030853 | CG5703 | -0.390074831 | -0.877835397 | 1 |
| FBgn0030289 | CG1597 | -0.33542889 | -0.875158545 | 1 |
| FBgn0003512 | Sry-delta | -0.474975861 | -0.871211435 | 1 |
| FBgn0003884 | alphaTub84B | -0.556628655 | -0.869399947 | 1 |
| FBgn0039757 | RpS7 | -0.539154952 | -0.868649257 | 0 |
| FBgn0029937 | CG8300 | -0.431514061 | -0.865176462 | 0 |
| FBgn0001098 | Gdh | -0.441087308 | -0.862830861 | 0 |
| FBgn0001149 | GstD1 | -0.38792068 | -0.858427503 | 1 |
| FBgn0052373 | CG32373 | -0.297352091 | -0.858100632 | 0 |
| FBgn0267385 | PyK | -0.333194817 | -0.855965634 | 0 |
| FBgn0031664 | CG8892 | -0.498288507 | -0.852426553 | 0 |
| FBgn0052484 | Sk2 | -0.317182198 | -0.850260775 | 0 |
| FBgn0030915 | CG6179 | -0.433970106 | -0.843581576 | 0 |
| FBgn0022772 | Orc1 | -0.467967859 | -0.836691612 | 0 |
| FBgn0024227 | aurB | -0.55158363 | -0.835571011 | 0 |
| FBgn0028342 | l(1)G0230 | -0.527107355 | -0.8328688 | 0 |
| FBgn0003464 | sol | -0.352601353 | -0.831021829 | 1 |
| FBgn0031114 | cactin | -0.50534467 | -0.82637496 | 0 |
| FBgn0004397 | Vinc | -0.235378773 | -0.824200666 | 1 |
| FBgn0025839 | CG3621 | -0.505144996 | -0.821468193 | 0 |
| FBgn0020279 | lig | -0.376826986 | -0.821218227 | 1 |
| FBgn0004832 | Xpac | -0.411724712 | -0.820522021 | 0 |
| FBgn0036314 | CG10754 | -0.32915456 | -0.818761929 | 0 |
| FBgn0037001 | CG6020 | -0.399300442 | -0.816552547 | 0 |
| FBgn0030966 | CG7280 | -0.531763553 | -0.814967671 | 1 |
| FBgn0261592 | RpS6 | -0.413389329 | -0.814912978 | 1 |
| FBgn0037981 | Spt3 | -0.394248034 | -0.814809626 | 0 |
| FBgn0053222 | CR33222 | -0.413364892 | -0.814806945 | 1 |
| FBgn0001308 | Khc | -0.491117584 | -0.813876256 | 0 |
| FBgn0014455 | Ahcy13 | -0.481075154 | -0.810875753 | 1 |
| FBgn0037607 | CG8036 | -0.280543269 | -0.807453103 | 1 |
| FBgn0033162 | CG1707 | -0.22332989 | -0.807329154 | 1 |
| FBgn0014868 | Ost48 | -0.463587072 | -0.803303475 | 0 |
| FBgn0011768 | Fdh | -0.43537988 | -0.79878489 | 1 |
| FBgn0032293 | Dpy-30L1 | -0.540742418 | -0.795344002 | 0 |
| FBgn0026679 | IntS4 | -0.498957705 | -0.7949904 | 0 |
| FBgn0029905 | Nf-YC | -0.494145186 | -0.793604566 | 0 |
| FBgn0034914 | CG5554 | -0.155967598 | -0.793259681 | 1 |
| FBgn0030963 | CG7101 | -0.584425268 | -0.791961911 | 1 |
| FBgn0003510 | Sry-alpha | -0.563200326 | -0.791476446 | 1 |
| FBgn0003511 | Sry-beta | -0.563200326 | -0.791476446 | 1 |
| FBgn0030792 | CG4789 | -0.378516646 | -0.786934182 | 0 |
| FBgn0030938 | CG15047 | -0.32873108 | -0.786174379 | 1 |
| FBgn0086904 | Nacalpha | -0.523729337 | -0.78574582 | 1 |
| FBgn0031711 | CG6907 | -0.300622098 | -0.784540656 | 0 |
| FBgn0030554 | CG1434 | -0.581902238 | -0.779242472 | 0 |
| FBgn0029860 | CG15891 | -0.388538797 | -0.777691409 | 0 |
| FBgn0002781 | mod(mdg4) | -0.544308996 | -0.775381997 | 1 |
| FBgn0032643 | CG6453 | -0.162622177 | -0.774958395 | 0 |
| FBgn0051550 | CG31550 | -0.415626067 | -0.774708114 | 1 |
| FBgn0266284 | Ns3 | -0.401902042 | -0.757756444 | 0 |
| FBgn0023517 | Pgam5 | -0.423485089 | -0.756949127 | 0 |
| FBgn0086695 | hd | -0.457224726 | -0.75692999 | 1 |
| FBgn0261394 | Prosalpha3 | -0.414040361 | -0.756064843 | 0 |
| FBgn0030336 | CG1578 | -0.37452945 | -0.754810715 | 1 |
| FBgn0001226 | Hsp27 | -0.164419859 | -0.751061362 | 0 |
| FBgn0039654 | Brd8 | -0.452545617 | -0.749440263 | 0 |
| FBgn0014002 | Pdi | -0.267087527 | -0.7492574 | 1 |
| FBgn0020235 | ATPsyn-gamma | -0.407802341 | -0.7454459 | 0 |
| FBgn0034877 | levy | -0.209537725 | -0.744815471 | 1 |
| FBgn0000116 | Argk | -0.298156963 | -0.742437197 | 1 |
| FBgn0002622 | RpS3 | -0.553882295 | -0.741100784 | 1 |
| FBgn0027329 | Tcp-1zeta | -0.346880573 | -0.741071313 | 1 |
| FBgn0032781 | CG9987 | -0.449603949 | -0.740845095 | 0 |
| FBgn0023169 | AMPKalpha | -0.489754274 | -0.738619057 | 1 |
| FBgn0032780 | CG13085 | -0.527419217 | -0.73849284 | 1 |
| FBgn0030465 | CG15743 | -0.376467462 | -0.737825926 | 0 |
| FBgn0000543 | ecd | -0.496638898 | -0.737256021 | 0 |
| FBgn0039698 | CG7789 | -0.464706779 | -0.736653511 | 0 |
| FBgn0015019 | Cctgamma | -0.465345516 | -0.736474167 | 1 |
| FBgn0030877 | Arp8 | -0.50379214 | -0.735185922 | 1 |
| FBgn0250837 | dUTPase | -0.552162847 | -0.734896118 | 0 |
| FBgn0032779 | CG16771 | -0.497648891 | -0.73020496 | 1 |
| FBgn0031068 | Alr | -0.457598147 | -0.728775414 | 1 |
| FBgn0000499 | dsh | -0.548232924 | -0.724504876 | 0 |
| FBgn0001970 | Pgant35A | -0.204684317 | -0.722481725 | 1 |
| FBgn0033179 | p47 | -0.358428623 | -0.72074653 | 0 |
| FBgn0033342 | CG8258 | -0.215841026 | -0.718527957 | 1 |
| FBgn0261479 | nero | -0.306608217 | -0.717837471 | 1 |
| FBgn0033692 | wash | -0.215737853 | -0.715611605 | 1 |
| FBgn0029888 | CG3192 | -0.285382146 | -0.715592958 | 0 |
| FBgn0004957 | por | -0.347162027 | -0.714672921 | 0 |
| FBgn0051549 | CG31549 | -0.52625225 | -0.714497849 | 1 |
| FBgn0004507 | GlyP | -0.336696814 | -0.71346455 | 0 |
| FBgn0023477 | Tal | -0.219305917 | -0.712919113 | 1 |
| FBgn0029823 | CG3011 | -0.434235621 | -0.711332055 | 0 |
| FBgn0036450 | Tdrd3 | -0.46761096 | -0.71111514 | 0 |
| FBgn0033663 | ERp60 | -0.347105907 | -0.710588198 | 1 |
| FBgn0265083 | CG44194 | -0.34275678 | -0.710119439 | 1 |
| FBgn0038107 | CG17327 | -0.34275678 | -0.710119439 | 1 |
| FBgn0261458 | capt | -0.167812377 | -0.709709357 | 0 |
| FBgn0260462 | CG12163 | -0.164264322 | -0.708955659 | 0 |
| FBgn0053193 | sav | -0.303388545 | -0.707698548 | 0 |
| FBgn0022343 | CG3760 | -0.192385077 | -0.699397337 | 1 |
| FBgn0015359 | CG2034 | -0.294455186 | -0.696824393 | 0 |
| FBgn0004404 | RpS14b | -0.518525553 | -0.695215734 | 1 |
| FBgn0259676 | DNApol-alpha60 | -0.50039924 | -0.693998574 | 0 |
| FBgn0039680 | Cap-D2 | -0.229664423 | -0.693354739 | 0 |
| FBgn0031360 | CG31937 | -0.352993966 | -0.69233492 | 0 |
| FBgn0015371 | chn | -0.358981107 | -0.687369752 | 0 |
| FBgn0019644 | ATPsyn-b | -0.580328988 | -0.687006429 | 0 |
| FBgn0043796 | CG12219 | -0.393199789 | -0.686423059 | 0 |
| FBgn0010488 | NAT1 | -0.403028025 | -0.680454412 | 1 |
| FBgn0001125 | Got2 | -0.327487615 | -0.679709834 | 0 |
| FBgn0001989 | l(2)35Di | -0.326150837 | -0.678736852 | 1 |
| FBgn0086698 | frtz | -0.445443189 | -0.678312664 | 0 |
| FBgn0033351 | CG8235 | -0.328109503 | -0.677878736 | 0 |
| FBgn0030671 | CG8134 | -0.373093835 | -0.676463541 | 1 |
| FBgn0000043 | Act42A | -0.446238502 | -0.675968704 | 1 |
| FBgn0000617 | e(y)1 | -0.449158908 | -0.675197112 | 0 |
| FBgn0024364 | CG11417 | -0.46842704 | -0.673990672 | 1 |
| FBgn0001324 | kto | -0.303095829 | -0.671533752 | 0 |
| FBgn0037612 | CG8112 | -0.36861603 | -0.670797325 | 0 |
| FBgn0001218 | Hsc70-3 | -0.289213694 | -0.669506969 | 1 |
| FBgn0025621 | CG16989 | -0.289297736 | -0.669125058 | 1 |
| FBgn0038872 | Nelf-A | -0.449517081 | -0.668781567 | 0 |
| FBgn0035589 | CHMP2B | -0.513021187 | -0.663881626 | 0 |
| FBgn0035422 | RpL28 | -0.301046839 | -0.663746457 | 1 |
| FBgn0034488 | CG11208 | -0.367278865 | -0.6630506 | 0 |
| FBgn0052536 | CG32536 | -0.583438621 | -0.660523444 | 0 |
| FBgn0039137 | CG13604 | -0.283329051 | -0.659445176 | 0 |
| FBgn0032698 | CG10336 | -0.564664194 | -0.659274916 | 1 |
| FBgn0039737 | CG7920 | -0.565127337 | -0.656872931 | 0 |
| FBgn0030521 | CtsB1 | -0.444702262 | -0.655713265 | 1 |
| FBgn0031606 | CG15439 | -0.213919554 | -0.654556614 | 0 |
| FBgn0011606 | Klp3A | -0.549628145 | -0.653975114 | 0 |
| FBgn0037094 | CG7611 | -0.432576743 | -0.651993051 | 0 |
| FBgn0034858 | eIF2B-delta | -0.523004165 | -0.651831226 | 1 |
| FBgn0263603 | Zn72D | -0.409035769 | -0.651776982 | 0 |
| FBgn0015031 | cype | -0.325123307 | -0.648352607 | 1 |
| FBgn0261641 | CG42724 | -0.567022413 | -0.645265257 | 1 |
| FBgn0003071 | Pfk | -0.383509363 | -0.642925835 | 1 |
| FBgn0037707 | RnpS1 | -0.482338171 | -0.642215371 | 0 |
| FBgn0023508 | Ocrl | -0.348164599 | -0.640542093 | 0 |
| FBgn0040346 | CG3704 | -0.556702155 | -0.640462638 | 1 |
| FBgn0024975 | CG2712 | -0.306529814 | -0.639678589 | 0 |
| FBgn0029709 | CHOp24 | -0.530028591 | -0.639149463 | 1 |
| FBgn0021795 | Tapdelta | -0.459851987 | -0.638778388 | 0 |
| FBgn0266420 | Ote | -0.276816891 | -0.637692725 | 0 |
| FBgn0024314 | Plap | -0.325292044 | -0.635873794 | 0 |
| FBgn0035318 | CG9018 | -0.399553952 | -0.634397526 | 0 |
| FBgn0001248 | Idh | -0.433718755 | -0.630856861 | 0 |
| FBgn0025117 | und | -0.426171093 | -0.628475969 | 0 |
| FBgn0250746 | Prosbeta7 | -0.294426012 | -0.627268589 | 1 |
| FBgn0027561 | CG18659 | -0.512648717 | -0.626848933 | 1 |
| FBgn0031713 | CG7277 | -0.421301058 | -0.626658518 | 0 |
| FBgn0031048 | CG12237 | -0.550336137 | -0.625991178 | 1 |
| FBgn0250874 | ttm50 | -0.374121207 | -0.625597906 | 0 |
| FBgn0039215 | CG6695 | -0.569937448 | -0.625002669 | 0 |
| FBgn0260450 | CalpC | -0.385081986 | -0.623896017 | 0 |
| FBgn0027087 | Aats-his | -0.335396303 | -0.623568732 | 1 |
| FBgn0017579 | RpL14 | -0.30800388 | -0.623220165 | 0 |
| FBgn0001961 | Arpc1 | -0.243395482 | -0.623061163 | 0 |
| FBgn0261596 | RpS24 | -0.372259067 | -0.619356011 | 0 |
| FBgn0029093 | cathD | -0.384042081 | -0.618614099 | 1 |
| FBgn0010412 | RpS19a | -0.568849668 | -0.617660049 | 1 |
| FBgn0030346 | CG11802 | -0.402308317 | -0.616188587 | 1 |
| FBgn0030434 | Brms1 | -0.469631946 | -0.61618715 | 1 |
| FBgn0030141 | Gga | -0.330964761 | -0.615641217 | 1 |
| FBgn0034258 | eIF3-S8 | -0.577420963 | -0.613329438 | 0 |
| FBgn0033814 | CG4670 | -0.508941943 | -0.612294531 | 1 |
| FBgn0016691 | Oscp | -0.284229891 | -0.612245612 | 0 |
| FBgn0028965 | A16 | -0.408368561 | -0.610946512 | 0 |
| FBgn0000181 | bic | -0.330153078 | -0.609613352 | 1 |
| FBgn0010602 | lwr | -0.28224525 | -0.609200325 | 1 |
| FBgn0013334 | Sap47 | -0.238355326 | -0.608369408 | 1 |
| FBgn0029873 | CG3918 | -0.508741432 | -0.605977512 | 1 |
| FBgn0020647 | KrT95D | -0.175021025 | -0.605610116 | 0 |
| FBgn0011655 | Med | -0.39780075 | -0.602766703 | 0 |
| FBgn0025640 | CG13369 | -0.249971555 | -0.601583532 | 0 |
| FBgn0015799 | Rbf | -0.400012381 | -0.599968072 | 1 |
| FBgn0041171 | ago | -0.317971669 | -0.59908951 | 1 |
| FBgn0030946 | CG6659 | -0.229690643 | -0.599032463 | 0 |
| FBgn0038771 | CG4390 | -0.210783695 | -0.597936287 | 0 |
| FBgn0029176 | Ef1gamma | -0.266285557 | -0.597722651 | 0 |
| FBgn0027841 | CstF-64 | -0.230831386 | -0.596879897 | 0 |
| FBgn0030858 | IntS2 | -0.545583246 | -0.596722121 | 1 |
| FBgn0035253 | CG7971 | -0.414727065 | -0.59504809 | 0 |
| FBgn0031450 | Hrs | -0.182186475 | -0.594720682 | 0 |
| FBgn0002284 | Prosbeta6 | -0.230927987 | -0.592321312 | 0 |
| FBgn0031682 | CG5828 | -0.250624875 | -0.587725792 | 0 |
| FBgn0038167 | lkb1 | -0.228565466 | -0.587717397 | 1 |
| FBgn0261562 | CG42676 | -0.505466193 | -0.587246607 | 0 |
| FBgn0034968 | RpL12 | -0.500572009 | -0.585706188 | 1 |
| FBgn0029157 | ssh | -0.351790045 | -0.585673921 | 0 |
| FBgn0040475 | SH3PX1 | -0.456281403 | -0.584025301 | 1 |
| FBgn0026415 | Idgf4 | -0.457856551 | -0.583203039 | 0 |
| FBgn0017551 | Rca1 | -0.304254211 | -0.58311956 | 0 |
| FBgn0028978 | trbl | -0.515216852 | -0.581420821 | 1 |
| FBgn0264357 | SNF4Agamma | -0.278566694 | -0.580766787 | 1 |
| FBgn0250848 | 26-29-p | -0.319276033 | -0.580388314 | 0 |
| FBgn0037632 | Tcp-1eta | -0.184306072 | -0.579035064 | 0 |
| FBgn0266064 | GlyS | -0.220287846 | -0.578532585 | 0 |
| FBgn0267790 | rump | -0.448153603 | -0.577415165 | 0 |
| FBgn0030679 | CG8206 | -0.473788963 | -0.577032213 | 0 |
| FBgn0010342 | Map60 | -0.474791229 | -0.57649268 | 1 |
| FBgn0030793 | CG9125 | -0.299687816 | -0.574774306 | 1 |
| FBgn0025381 | rush | -0.577691012 | -0.574489714 | 1 |
| FBgn0027609 | morgue | -0.342670421 | -0.574475831 | 0 |
| FBgn0037135 | CG7414 | -0.445533601 | -0.574462525 | 1 |
| FBgn0020370 | TppII | -0.166270451 | -0.57346758 | 1 |
| FBgn0028474 | CG4119 | -0.397205367 | -0.571864623 | 0 |
| FBgn0027493 | AdSS | -0.573236822 | -0.570754204 | 1 |
| FBgn0031321 | Tgt | -0.423254389 | -0.570131879 | 0 |
| FBgn0050359 | Mal-A5 | -0.561445739 | -0.568047089 | 0 |
| FBgn0052831 | CG33695 | -0.550458069 | -0.566001856 | 0 |
| FBgn0046222 | CG1109 | -0.420973495 | -0.56591287 | 1 |
| FBgn0034750 | CG3732 | -0.248041944 | -0.56446736 | 0 |
| FBgn0264817 | pre-lola-G | -0.446923841 | -0.5639288 | 0 |
| FBgn0027508 | Tnks | -0.291934733 | -0.563618708 | 1 |
| FBgn0041775 | tral | -0.432347479 | -0.562847509 | 1 |
| FBgn0041342 | Cct1 | -0.271790882 | -0.562746025 | 0 |
| FBgn0259720 | CG42374 | -0.439933436 | -0.560073761 | 0 |
| FBgn0036856 | CG9666 | -0.439933436 | -0.560073761 | 0 |
| FBgn0033486 | dmpd | -0.370614528 | -0.558688071 | 1 |
| FBgn0032479 | CG16974 | -0.408008821 | -0.558069046 | 0 |
| FBgn0034908 | CG5543 | -0.454193704 | -0.557892469 | 0 |
| FBgn0039696 | CG7837 | -0.183806105 | -0.556795913 | 1 |
| FBgn0030000 | CG2260 | -0.261713635 | -0.556720817 | 0 |
| FBgn0086356 | tum | -0.52188671 | -0.555351681 | 0 |
| FBgn0003330 | Sce | -0.489166225 | -0.554915148 | 0 |
| FBgn0024273 | WASp | -0.373381668 | -0.554312946 | 0 |
| FBgn0026753 | Vha13 | -0.185243137 | -0.554151068 | 1 |
| FBgn0037313 | CG1161 | -0.316107275 | -0.553752815 | 1 |
| FBgn0039301 | Nup37 | -0.309642964 | -0.552613688 | 1 |
| FBgn0034921 | DCP1 | -0.257448178 | -0.552363283 | 0 |
| FBgn0086346 | ALiX | -0.222825515 | -0.551639052 | 0 |
| FBgn0030499 | CG11178 | -0.259844023 | -0.550367213 | 0 |
| FBgn0050377 | CG30377 | -0.246926062 | -0.550181054 | 1 |
| FBgn0005596 | yem | -0.388417724 | -0.5492374 | 1 |
| FBgn0024807 | DIP1 | -0.385019493 | -0.548286882 | 1 |
| FBgn0031318 | CG4887 | -0.346044966 | -0.547832551 | 0 |
| FBgn0039341 | CG5112 | -0.334911642 | -0.545934048 | 1 |
| FBgn0026479 | Drp1 | -0.17203622 | -0.545350639 | 0 |
| FBgn0034650 | NC2alpha | -0.405322389 | -0.543876607 | 0 |
| FBgn0038722 | Nup58 | -0.322546764 | -0.543565441 | 1 |
| FBgn0003074 | Pgi | -0.285661709 | -0.542389334 | 0 |
| FBgn0266170 | pre-mod(mdg4)-C | -0.388678744 | -0.542081033 | 0 |
| FBgn0266172 | pre-mod(mdg4)-E | -0.388678744 | -0.542081033 | 0 |
| FBgn0266171 | pre-mod(mdg4)-AB | -0.388678744 | -0.542081033 | 0 |
| FBgn0038876 | CG5919 | -0.521787261 | -0.541884929 | 0 |
| FBgn0259734 | CG42388 | -0.316794783 | -0.54100222 | 1 |
| FBgn0040208 | Kat60 | -0.294507912 | -0.54010044 | 1 |
| FBgn0015527 | pen | -0.348546772 | -0.539854904 | 1 |
| FBgn0260972 | alc | -0.455281763 | -0.539651615 | 1 |
| FBgn0031174 | CG1486 | -0.191779062 | -0.537912808 | 1 |
| FBgn0026143 | CDC45L | -0.402161569 | -0.537655227 | 0 |
| FBgn0033402 | Myd88 | -0.284166451 | -0.535803042 | 0 |
| FBgn0052649 | CG32649 | -0.521450003 | -0.535281604 | 0 |
| FBgn0021872 | Xbp1 | -0.526059894 | -0.534993499 | 1 |
| FBgn0027084 | Aats-lys | -0.543926885 | -0.534456189 | 0 |
| FBgn0030659 | CG9215 | -0.298330158 | -0.53410328 | 1 |
| FBgn0035060 | Eps-15 | -0.210006837 | -0.533890395 | 0 |
| FBgn0005593 | RpL7 | -0.448445942 | -0.533618556 | 0 |
| FBgn0030263 | CG2076 | -0.243557143 | -0.533213269 | 0 |
| FBgn0266000 | CG44774 | -0.198952499 | -0.532902529 | 1 |
| FBgn0037653 | CG11982 | -0.398351263 | -0.532590073 | 0 |
| FBgn0039740 | CG7928 | -0.29797806 | -0.530231057 | 0 |
| FBgn0034646 | Rae1 | -0.504372706 | -0.529913809 | 0 |
| FBgn0031047 | Rcd-1 | -0.16157089 | -0.529148504 | 1 |
| FBgn0010269 | Dsor1 | -0.251720444 | -0.528691411 | 0 |
| FBgn0037660 | beag | -0.490619896 | -0.528539031 | 0 |
| FBgn0038016 | MBD-R2 | -0.389462211 | -0.528025362 | 1 |
| FBgn0052815 | CG32815 | -0.484109482 | -0.526400933 | 0 |
| FBgn0039543 | CG12428 | -0.560745876 | -0.525911532 | 0 |
| FBgn0040340 | TRAM | -0.49709511 | -0.525851923 | 0 |
| FBgn0031883 | Caper | -0.275314012 | -0.525703671 | 0 |
| FBgn0030768 | CG9723 | -0.499179422 | -0.522887285 | 0 |
| FBgn0023515 | CG14814 | -0.509679729 | -0.522372238 | 1 |
| FBgn0031304 | CG4552 | -0.376463777 | -0.520984005 | 0 |
| FBgn0033349 | CG8243 | -0.308375622 | -0.520316516 | 0 |
| FBgn0052528 | parvin | -0.340451994 | -0.518995817 | 1 |
| FBgn0266526 | CG45093 | -0.238485364 | -0.518107796 | 1 |
| FBgn0050497 | CG30497 | -0.238485364 | -0.518107796 | 1 |
| FBgn0044323 | Cka | -0.40017033 | -0.517761426 | 1 |
| FBgn0036762 | CG7430 | -0.378399159 | -0.516536048 | 1 |
| FBgn0043002 | Chrac-14 | -0.465141057 | -0.516134904 | 1 |
| FBgn0028336 | l(1)G0255 | -0.474637943 | -0.515990131 | 0 |
| FBgn0050122 | CG30122 | -0.19973399 | -0.515250207 | 0 |
| FBgn0000064 | Ald | -0.580116744 | -0.515246709 | 0 |
| FBgn0031092 | CG9577 | -0.385758754 | -0.513138244 | 1 |
| FBgn0035026 | Fcp1 | -0.27408256 | -0.512596473 | 0 |
| FBgn0030246 | CG1582 | -0.485552917 | -0.512577833 | 0 |
| FBgn0015929 | dpa | -0.342965088 | -0.511589123 | 1 |
| FBgn0030328 | Amun | -0.293099301 | -0.511503331 | 1 |
| FBgn0010830 | l(3)04053 | -0.330371431 | -0.508625263 | 1 |
| FBgn0032884 | Pomp | -0.336818018 | -0.504688668 | 0 |
| FBgn0034585 | Rbpn-5 | -0.294473554 | -0.504524966 | 0 |
| FBgn0030268 | Klp10A | -0.367064325 | -0.503880792 | 1 |
| FBgn0028984 | Spn88Ea | -0.264519251 | -0.503836661 | 1 |
| FBgn0051211 | CG31211 | -0.229441937 | -0.503366729 | 1 |
| FBgn0027579 | mino | -0.334117728 | -0.503352724 | 1 |
| FBgn0015379 | dod | -0.39143579 | -0.50310094 | 1 |
| FBgn0000152 | Axs | -0.433244398 | -0.503049576 | 0 |
| FBgn0023175 | Prosalpha7 | -0.26921928 | -0.50214115 | 0 |
| FBgn0040347 | mus81 | -0.321353438 | -0.500630914 | 1 |
| FBgn0003638 | su(w[a]) | -0.357121435 | -0.500432268 | 1 |
| FBgn0030584 | CG14407 | -0.285451699 | -0.499025912 | 0 |
| FBgn0052250 | CG32250 | -0.570494822 | -0.497275516 | 0 |
| FBgn0030802 | CG9099 | -0.304868798 | -0.496484883 | 0 |
| FBgn0035771 | Sec63 | -0.520705408 | -0.495692113 | 1 |
| FBgn0002525 | Lam | -0.394927036 | -0.495459199 | 1 |
| FBgn0036641 | Smn | -0.308739822 | -0.494532113 | 1 |
| FBgn0027605 | Vps4 | -0.231739102 | -0.493275975 | 0 |
| FBgn0035520 | CG11586 | -0.427341874 | -0.493098266 | 0 |
| FBgn0037297 | CG1116 | -0.361917104 | -0.492694003 | 0 |
| FBgn0262872 | milt | -0.233869263 | -0.49185911 | 1 |
| FBgn0030007 | CG2263 | -0.36476562 | -0.491256137 | 1 |
| FBgn0035981 | CG4452 | -0.305611096 | -0.491106565 | 0 |
| FBgn0263979 | Caf1 | -0.255926008 | -0.488331023 | 0 |
| FBgn0029874 | CG3342 | -0.330041645 | -0.488113755 | 1 |
| FBgn0037881 | GCC88 | -0.444464745 | -0.487180759 | 0 |
| FBgn0030060 | CG2004 | -0.373439859 | -0.48716436 | 0 |
| FBgn0039849 | CG11334 | -0.512973932 | -0.487000766 | 0 |
| FBgn0003598 | Su(var)3-7 | -0.454329244 | -0.486918467 | 0 |
| FBgn0004811 | fs(2)ltoPP43 | -0.396361902 | -0.483982376 | 1 |
| FBgn0024833 | AP-1mu | -0.57296398 | -0.483607916 | 0 |
| FBgn0262114 | RanBPM | -0.265916297 | -0.483062166 | 0 |
| FBgn0259785 | pzg | -0.330859684 | -0.482175298 | 0 |
| FBgn0040075 | rept | -0.547051457 | -0.481843404 | 0 |
| FBgn0011741 | Arp6 | -0.474567055 | -0.480032003 | 0 |
| FBgn0263198 | Acn | -0.457313194 | -0.478720379 | 0 |
| FBgn0038300 | CG4203 | -0.573111711 | -0.47836697 | 1 |
| FBgn0027554 | CG8042 | -0.341124154 | -0.477522465 | 0 |
| FBgn0039710 | dgt1 | -0.548830669 | -0.476988254 | 0 |
| FBgn0262125 | Sec23 | -0.270755745 | -0.476690823 | 1 |
| FBgn0037026 | CG3634 | -0.452966516 | -0.476280381 | 1 |
| FBgn0001978 | stc | -0.331524833 | -0.476059847 | 0 |
| FBgn0010750 | atms | -0.257500292 | -0.475531707 | 1 |
| FBgn0028497 | CG3530 | -0.330373569 | -0.475449749 | 0 |
| FBgn0015283 | Rpn10 | -0.220383607 | -0.474788583 | 1 |
| FBgn0026433 | Grip128 | -0.255089294 | -0.474380991 | 1 |
| FBgn0031298 | Atg4a | -0.268285344 | -0.473680102 | 0 |
| FBgn0030701 | CG16952 | -0.246868394 | -0.469361265 | 1 |
| FBgn0002787 | Rpn8 | -0.227570339 | -0.46859162 | 1 |
| FBgn0033382 | Hydr1 | -0.329185801 | -0.468001091 | 1 |
| FBgn0035872 | CG7185 | -0.581409274 | -0.467485001 | 1 |
| FBgn0015625 | CycB3 | -0.557320828 | -0.467193837 | 0 |
| FBgn0261791 | SmG | -0.492721624 | -0.46695247 | 1 |
| FBgn0027903 | CG12018 | -0.297751813 | -0.466871319 | 0 |
| FBgn0031535 | CG12795 | -0.394385086 | -0.465602775 | 0 |
| FBgn0000250 | cact | -0.554451023 | -0.463671239 | 1 |
| FBgn0021825 | Dmn | -0.192040543 | -0.462361031 | 0 |
| FBgn0029891 | Pink1 | -0.236025778 | -0.462135887 | 1 |
| FBgn0025724 | betaCOP | -0.27961905 | -0.461726059 | 0 |
| FBgn0029820 | CG16721 | -0.239911907 | -0.460854414 | 0 |
| FBgn0013576 | mtd | -0.162371912 | -0.459782198 | 0 |
| FBgn0027525 | CG7686 | -0.5544576 | -0.458886815 | 0 |
| FBgn0016794 | dos | -0.275867054 | -0.458759702 | 1 |
| FBgn0040309 | Jafrac1 | -0.183938703 | -0.456721805 | 1 |
| FBgn0026566 | CG1307 | -0.321895197 | -0.456515492 | 0 |
| FBgn0000996 | dup | -0.412099124 | -0.45633727 | 0 |
| FBgn0035121 | Tudor-SN | -0.404867582 | -0.456247278 | 1 |
| FBgn0000351 | cort | -0.352254392 | -0.453894529 | 1 |
| FBgn0029512 | Aos1 | -0.191952262 | -0.45249668 | 1 |
| FBgn0002022 | Catsup | -0.440117976 | -0.451739761 | 1 |
| FBgn0030318 | rho-4 | -0.231583461 | -0.451662811 | 0 |
| FBgn0032105 | borr | -0.248604802 | -0.448396584 | 0 |
| FBgn0002638 | Rcc1 | -0.224098153 | -0.44726291 | 0 |
| FBgn0035357 | MEP-1 | -0.333239776 | -0.446400775 | 0 |
| FBgn0250911 | CG42245 | -0.333239776 | -0.446400775 | 0 |
| FBgn0261794 | kcc | -0.520010963 | -0.444920994 | 1 |
| FBgn0002783 | mor | -0.393531022 | -0.443076563 | 1 |
| FBgn0026323 | Tak1 | -0.260533517 | -0.442372547 | 1 |
| FBgn0015296 | Shc | -0.231130445 | -0.442265545 | 1 |
| FBgn0263077 | CG43340 | -0.475153745 | -0.441082455 | 1 |
| FBgn0003268 | rod | -0.253499744 | -0.440129907 | 0 |
| FBgn0020388 | Gcn5 | -0.289085658 | -0.437471403 | 0 |
| FBgn0000556 | Ef1alpha48D | -0.423599204 | -0.436411402 | 1 |
| FBgn0037051 | CG10565 | -0.487962868 | -0.435140985 | 1 |
| FBgn0029833 | CG5941 | -0.551078426 | -0.430311387 | 1 |
| FBgn0038274 | Nup93-2 | -0.409129965 | -0.428845885 | 0 |
| FBgn0031285 | CG3662 | -0.229324997 | -0.427378318 | 0 |
| FBgn0263998 | Ack-like | -0.134434343 | -0.42268786 | 0 |
| FBgn0031054 | Ssu72 | -0.410562411 | -0.4216802 | 1 |
| FBgn0023094 | cyc | -0.161940034 | -0.421616486 | 0 |
| FBgn0019960 | CG6455 | -0.27219373 | -0.417200165 | 1 |
| FBgn0038552 | CG18012 | -0.575883345 | -0.416991107 | 0 |
| FBgn0033241 | CG2915 | -0.416883058 | -0.416674099 | 1 |
| FBgn0263667 | Lpt | -0.435505477 | -0.416321951 | 0 |
| FBgn0011763 | Dp | -0.545622339 | -0.415233375 | 0 |
| FBgn0030507 | CG11164 | -0.353760076 | -0.412070301 | 1 |
| FBgn0052343 | Atac3 | -0.296617114 | -0.411889769 | 0 |
| FBgn0260985 | RfC4 | -0.400285253 | -0.411549829 | 1 |
| FBgn0015818 | Spx | -0.555194302 | -0.41152495 | 0 |
| FBgn0039563 | CG4951 | -0.272492338 | -0.41030228 | 1 |
| FBgn0027616 | YT521-B | -0.354465002 | -0.408816389 | 0 |
| FBgn0050020 | CG30020 | -0.509272401 | -0.408247507 | 1 |
| FBgn0267651 | pre-mod(mdg4)-O | -0.295860027 | -0.40773366 | 0 |
| FBgn0267652 | pre-mod(mdg4)-N | -0.295860027 | -0.40773366 | 0 |
| FBgn0267650 | pre-mod(mdg4)-AA | -0.295860027 | -0.40773366 | 0 |
| FBgn0004132 | boca | -0.408782381 | -0.407362847 | 0 |
| FBgn0034181 | CG8963 | -0.321529783 | -0.407286069 | 0 |
| FBgn0035268 | CG8001 | -0.230359264 | -0.404626197 | 1 |
| FBgn0037657 | hyx | -0.31427279 | -0.404003992 | 1 |
| FBgn0039348 | Npl4 | -0.250419921 | -0.403660423 | 0 |
| FBgn0026409 | Mpcp | -0.522122227 | -0.402769561 | 0 |
| FBgn0250820 | meigo | -0.53475172 | -0.399938795 | 1 |
| FBgn0001225 | Hsp26 | -0.341378613 | -0.399055478 | 0 |
| FBgn0032935 | Atg18b | -0.377978911 | -0.397305224 | 1 |
| FBgn0265935 | coro | -0.556462922 | -0.396178481 | 1 |
| FBgn0265190 | PIG-S | -0.448729179 | -0.396046564 | 0 |
| FBgn0029929 | CG4593 | -0.345905338 | -0.394814077 | 0 |
| FBgn0026598 | Apc2 | -0.500870943 | -0.392527887 | 0 |
| FBgn0038318 | CG6236 | -0.227502606 | -0.391001429 | 1 |
| FBgn0265189 | CG44254 | -0.283975713 | -0.387683327 | 0 |
| FBgn0037144 | CG7458 | -0.349354816 | -0.387069181 | 0 |
| FBgn0033463 | CG1513 | -0.417351196 | -0.381890854 | 0 |
| FBgn0036671 | CG9951 | -0.25859127 | -0.380249433 | 1 |
| FBgn0035518 | CG15011 | -0.50008268 | -0.380154345 | 1 |
| FBgn0001124 | Got1 | -0.292387273 | -0.379393565 | 0 |
| FBgn0262801 | twr | -0.319501075 | -0.378665485 | 0 |
| FBgn0036237 | viaf | -0.351045877 | -0.378495293 | 0 |
| FBgn0014366 | noi | -0.463320375 | -0.377984106 | 1 |
| FBgn0031191 | Cp110 | -0.288932954 | -0.376915378 | 1 |
| FBgn0013987 | MAPk-Ak2 | -0.226095328 | -0.374848868 | 0 |
| FBgn0030672 | CG9281 | -0.306708982 | -0.374388187 | 1 |
| FBgn0027094 | Aats-ala | -0.22246533 | -0.371180684 | 1 |
| FBgn0264294 | Cyt-b5 | -0.472203904 | -0.365240987 | 1 |
| FBgn0033352 | PAN2 | -0.344598995 | -0.364540453 | 0 |
| FBgn0039056 | CenB1A | -0.257630533 | -0.362627971 | 0 |
| FBgn0030855 | CG5800 | -0.254774032 | -0.361668474 | 0 |
| FBgn0039830 | CG1746 | -0.169724737 | -0.358745066 | 1 |
| FBgn0025463 | Bap60 | -0.485049357 | -0.357169136 | 0 |
| FBgn0031769 | CG9135 | -0.155755132 | -0.353018663 | 1 |
| FBgn0020369 | Rpt6 | -0.137769334 | -0.3486783 | 1 |
| FBgn0263602 | Taspase1 | -0.579074603 | -0.341502241 | 0 |
| FBgn0025700 | CG5885 | -0.539410711 | -0.340808246 | 1 |
| FBgn0040493 | grsm | -0.395196904 | -0.331230823 | 0 |
| FBgn0000042 | Act5C | -0.18152885 | -0.324677299 | 1 |
| FBgn0035205 | CG2469 | -0.244530879 | -0.319453465 | 0 |
| FBgn0024432 | Dlc90F | -0.411211625 | -0.312574897 | 1 |
| FBgn0029657 | CG12535 | 7.452678278 | 6.316101662 | 1 |
| FBgn0263744 | CR43669 | 7.190242403 | 6.98007951 | 1 |
| FBgn0029664 | CG10802 | 6.66813874 | 5.253186107 | 1 |
| FBgn0261041 | stj | 6.57966757 | 5.283914187 | 0 |
| FBgn0032888 | CheB38c | 6.164089504 | 6.716749262 | 1 |
| FBgn0262534 | CG43088 | 5.864059968 | 10.17151614 | 0 |
| FBgn0267667 | CR46005 | 4.859787784 | 6.168430895 | 0 |
| FBgn0013813 | Dhc98D | 4.512000087 | 2.619451869 | 0 |
| FBgn0019650 | toy | 4.243895344 | 1.758636056 | 1 |
| FBgn0030073 | CG10962 | 4.195531502 | 3.016690959 | 0 |
| FBgn0264835 | CR44043 | 4.105313663 | 4.324312629 | 1 |
| FBgn0052719 | CG32719 | 4.065316778 | 2.756068813 | 0 |
| FBgn0034411 | CG18605 | 4.047049688 | 3.315604935 | 0 |
| FBgn0015569 | alpha-Est10 | 3.949902393 | 1.609977427 | 1 |
| FBgn0266690 | CR45180 | 3.729371073 | 2.392337118 | 1 |
| FBgn0266657 | CR45164 | 3.713497314 | 1.878243593 | 1 |
| FBgn0259927 | CG42450 | 3.691880822 | 2.736817015 | 1 |
| FBgn0263001 | CR43309 | 3.614729492 | 1.873406942 | 1 |
| FBgn0033602 | Cpr47Ee | 3.581664354 | 3.202850413 | 0 |
| FBgn0266710 | hog | 3.535152142 | 5.838572258 | 0 |
| FBgn0086917 | spok | 3.492450202 | 3.840381991 | 1 |
| FBgn0035948 | CG5644 | 3.487188241 | 5.275398405 | 0 |
| FBgn0262598 | mtsh | 3.475000729 | 3.383951638 | 1 |
| FBgn0052259 | CG32259 | 3.372949361 | 6.347293613 | 0 |
| FBgn0020908 | Scp1 | 3.311301744 | 4.265553101 | 1 |
| FBgn0037183 | CG14451 | 3.271591828 | 4.269883062 | 1 |
| FBgn0030230 | Rph | 3.268983034 | 1.918209745 | 1 |
| FBgn0015774 | NetB | 3.249693635 | 3.742545772 | 1 |
| FBgn0004797 | mdy | 3.247923956 | 2.271979679 | 1 |
| FBgn0051004 | mesh | 3.240528054 | 3.630567548 | 0 |
| FBgn0039124 | tbrd-1 | 3.212559132 | 3.273833907 | 0 |
| FBgn0054010 | CG34010 | 3.191586937 | 5.716507579 | 0 |
| FBgn0020493 | Dad | 3.076413441 | 1.25893069 | 0 |
| FBgn0036956 | CG13813 | 3.061035614 | 2.501098714 | 1 |
| FBgn0265725 | CG44532 | 2.94017817 | 3.63697648 | 1 |
| FBgn0052865 | alphagamma-element:CR32865 | 2.934784777 | 2.145187546 | 0 |
| FBgn0036670 | CG13029 | 2.890203873 | 3.031034984 | 1 |
| FBgn0039651 | CG14508 | 2.87570258 | 2.490493251 | 1 |
| FBgn0034075 | Asph | 2.843346049 | 3.117858447 | 1 |
| FBgn0033785 | Sans | 2.768807797 | 3.410130957 | 0 |
| FBgn0261393 | alpha-Est5 | 2.747655082 | 1.247733607 | 1 |
| FBgn0264958 | CR44127 | 2.727310557 | 3.2778887 | 0 |
| FBgn0003302 | rux | 2.722910473 | 0.993944046 | 1 |
| FBgn0262123 | l(2)41Ab | 2.713163619 | 4.690152365 | 1 |
| FBgn0263617 | CR43626 | 2.671908215 | 2.79050244 | 1 |
| FBgn0264746 | CG44004 | 2.65858654 | 1.707162762 | 0 |
| FBgn0040849 | Ir41a | 2.632180582 | 2.034797904 | 1 |
| FBgn0264439 | CR43857 | 2.618196592 | 2.864805441 | 1 |
| FBgn0033257 | CG8713 | 2.614234304 | 0.833250486 | 0 |
| FBgn0054031 | CG34031 | 2.537664047 | 2.954101238 | 1 |
| FBgn0267429 | CG45782 | 2.534386377 | 2.961759974 | 1 |
| FBgn0264675 | CR43960 | 2.497552575 | 1.833318227 | 1 |
| FBgn0036446 | CG9384 | 2.451832874 | 1.011063191 | 0 |
| FBgn0011288 | Snap25 | 2.332530618 | 2.021025993 | 1 |
| FBgn0031058 | CG14227 | 2.328264168 | 3.911739187 | 1 |
| FBgn0034321 | CG14502 | 2.328165537 | 1.48678218 | 0 |
| FBgn0267001 | Ten-a | 2.31613235 | 1.587324492 | 1 |
| FBgn0267430 | CG45783 | 2.305448976 | 2.5374248 | 1 |
| FBgn0036331 | CG14117 | 2.297662847 | 1.148780183 | 0 |
| FBgn0052195 | CG32195 | 2.293784388 | 1.624264688 | 0 |
| FBgn0050401 | CG30401 | 2.292568517 | 1.883213622 | 0 |
| FBgn0016036 | mei-P22 | 2.284213851 | 2.074163941 | 0 |
| FBgn0010768 | sqz | 2.26561858 | 0.663219712 | 0 |
| FBgn0050403 | CG30403 | 2.246516472 | 2.083776402 | 1 |
| FBgn0000246 | c(3)G | 2.241265083 | 1.768996779 | 0 |
| FBgn0029831 | CG5966 | 2.154094053 | 1.602860712 | 0 |
| FBgn0263974 | qin | 2.13836074 | 1.138621339 | 0 |
| FBgn0051999 | CG31999 | 2.088868322 | 2.107202043 | 1 |
| FBgn0250876 | Sema-5c | 2.085912168 | 1.039984897 | 0 |
| FBgn0032166 | CG4619 | 2.070737757 | 0.911548269 | 0 |
| FBgn0027571 | CG3523 | 2.059633974 | 1.016221898 | 0 |
| FBgn0013983 | imd | 2.051527393 | 1.055863007 | 0 |
| FBgn0267431 | CG45784 | 2.04399737 | 2.273359195 | 1 |
| FBgn0024366 | CG11409 | 2.035885982 | 1.756362214 | 0 |
| FBgn0000018 | abo | 2.021024387 | 1.223723661 | 0 |
| FBgn0035571 | CG12493 | 2.007485921 | 1.651579314 | 0 |
| FBgn0037670 | Ibf1 | 2.006197285 | 1.22802706 | 1 |
| FBgn0038247 | Cad88C | 1.977444994 | 3.028315458 | 0 |
| FBgn0264698 | CR43967 | 1.975663834 | 2.197942786 | 1 |
| FBgn0260995 | CG42596 | 1.95339271 | 2.652375821 | 1 |
| FBgn0035673 | CG6602 | 1.952924032 | 2.873233486 | 0 |
| FBgn0029825 | CG12728 | 1.938906433 | 1.068929911 | 0 |
| FBgn0262945 | CR43264 | 1.93085372 | 2.482370408 | 0 |
| FBgn0039945 | CG17159 | 1.925762276 | 0.520734193 | 1 |
| FBgn0039944 | CG17162 | 1.917760861 | 0.511308087 | 1 |
| FBgn0264748 | CG44006 | 1.899273245 | 2.912898334 | 0 |
| FBgn0037513 | pyd3 | 1.896890645 | 2.773600512 | 0 |
| FBgn0030716 | CG9170 | 1.893675676 | 2.695829831 | 1 |
| FBgn0023023 | CRMP | 1.889681652 | 2.935196755 | 1 |
| FBgn0037105 | S1P | 1.885333393 | 1.013409659 | 0 |
| FBgn0027552 | CG10863 | 1.882714936 | 0.596507475 | 0 |
| FBgn0034442 | CG11257 | 1.882348572 | 0.865215077 | 0 |
| FBgn0083956 | CG34120 | 1.859237917 | 0.699985461 | 0 |
| FBgn0020248 | stet | 1.852404373 | 0.65269416 | 0 |
| FBgn0032025 | CG7778 | 1.839977186 | 2.66632669 | 0 |
| FBgn0003169 | put | 1.826740158 | 0.81056872 | 0 |
| FBgn0051216 | Naam | 1.822501216 | 0.836473069 | 0 |
| FBgn0036896 | wnd | 1.817366346 | 0.772040402 | 1 |
| FBgn0003866 | tsh | 1.813794768 | 1.401419345 | 1 |
| FBgn0037742 | Rpt3R | 1.78299643 | 1.577157229 | 1 |
| FBgn0011206 | bol | 1.766028381 | 1.610349676 | 1 |
| FBgn0051619 | CG31619 | 1.738287917 | 3.516841248 | 1 |
| FBgn0261647 | Axud1 | 1.738106685 | 0.556380385 | 0 |
| FBgn0000119 | arr | 1.721117304 | 0.791647249 | 0 |
| FBgn0033540 | Elp2 | 1.71326706 | 1.155145858 | 0 |
| FBgn0005390 | fs(1)M3 | 1.712272042 | 1.328766331 | 0 |
| FBgn0010316 | dap | 1.711738215 | 0.874900273 | 0 |
| FBgn0050394 | CG30394 | 1.68507226 | 0.827582225 | 0 |
| FBgn0262620 | CR43144 | 1.680843013 | 3.065995222 | 1 |
| FBgn0023416 | Ac3 | 1.68069094 | 1.963486532 | 1 |
| FBgn0003997 | hid | 1.658510403 | 1.14904969 | 1 |
| FBgn0033087 | Hsepi | 1.649744997 | 0.607159139 | 0 |
| FBgn0030361 | CG1492 | 1.649046675 | 0.567443504 | 1 |
| FBgn0040827 | CG13315 | 1.643055484 | 1.860087607 | 0 |
| FBgn0028645 | beat-Ib | 1.6369229 | 2.519730754 | 0 |
| FBgn0011764 | Dsp1 | 1.624909652 | 0.556903296 | 1 |
| FBgn0035213 | CG2199 | 1.619851071 | 0.697548488 | 0 |
| FBgn0035151 | CG17129 | 1.607409428 | 1.123829473 | 0 |
| FBgn0050383 | CG30383 | 1.602367484 | 2.699881505 | 1 |
| FBgn0039914 | mav | 1.592278259 | 1.951288533 | 1 |
| FBgn0033661 | CG13185 | 1.59083631 | 0.716273439 | 0 |
| FBgn0032079 | CG31886 | 1.589328474 | 0.70804551 | 1 |
| FBgn0039958 | CG12567 | 1.585153435 | 1.182641803 | 1 |
| FBgn0266731 | CR45204 | 1.58147292 | 1.441740488 | 0 |
| FBgn0030629 | CG9123 | 1.579132389 | 0.672541021 | 0 |
| FBgn0051898 | CG31898 | 1.57461467 | 1.402352193 | 0 |
| FBgn0052756 | CG32756 | 1.566328461 | 0.844332379 | 0 |
| FBgn0030852 | CG8316 | 1.545180904 | 1.780635318 | 1 |
| FBgn0052582 | CR32582 | 1.535483659 | 2.492702701 | 1 |
| FBgn0033763 | CG8646 | 1.535050224 | 2.658111809 | 0 |
| FBgn0035158 | CG13895 | 1.531826464 | 1.488837738 | 1 |
| FBgn0003742 | tra2 | 1.528763764 | 0.544619007 | 0 |
| FBgn0031814 | retm | 1.513841813 | 0.572292014 | 1 |
| FBgn0039165 | CG6204 | 1.510623401 | 1.80707112 | 0 |
| FBgn0039836 | CG1750 | 1.509996716 | 2.11957881 | 0 |
| FBgn0063923 | Kaz1-ORFB | 1.508381811 | 1.929266755 | 0 |
| FBgn0039883 | RhoGAP100F | 1.50765388 | 2.453091013 | 1 |
| FBgn0265623 | Su(z)2 | 1.506104751 | 0.808073408 | 1 |
| FBgn0014342 | mia | 1.483377613 | 3.414280455 | 1 |
| FBgn0037445 | CG9727 | 1.483004223 | 0.476198128 | 1 |
| FBgn0033564 | Pex6 | 1.482672568 | 0.701058612 | 0 |
| FBgn0262699 | rap | 1.477680138 | 0.442678891 | 0 |
| FBgn0038660 | CG14291 | 1.467975977 | 1.093462935 | 0 |
| FBgn0086448 | Gpi1 | 1.454706874 | 1.005354019 | 1 |
| FBgn0000317 | ck | 1.45296578 | 0.592107365 | 1 |
| FBgn0011259 | Sema-1a | 1.451438312 | 0.487378761 | 0 |
| FBgn0036273 | CG10426 | 1.450809866 | 0.609121405 | 0 |
| FBgn0038098 | CG7381 | 1.441938477 | 3.298074217 | 0 |
| FBgn0010317 | CycJ | 1.438417747 | 0.70189986 | 0 |
| FBgn0260435 | CR42530 | 1.429843543 | 2.54015801 | 1 |
| FBgn0037521 | CG2993 | 1.429158554 | 3.005222208 | 1 |
| FBgn0036463 | Reck | 1.427146318 | 2.275297689 | 0 |
| FBgn0003459 | stwl | 1.421209906 | 0.782064927 | 1 |
| FBgn0004583 | ex | 1.420878866 | 0.82948116 | 0 |
| FBgn0026199 | myo | 1.41502305 | 0.76860849 | 1 |
| FBgn0263660 | CR43651 | 1.411281725 | 1.73474365 | 1 |
| FBgn0266742 | CR45215 | 1.411252417 | 3.060043181 | 1 |
| FBgn0260748 | CG5004 | 1.395841797 | 0.505491496 | 1 |
| FBgn0052641 | CG32641 | 1.390982619 | 1.808298716 | 0 |
| FBgn0265104 | CR44206 | 1.388669316 | 2.326725064 | 0 |
| FBgn0082582 | tmod | 1.376471005 | 0.522292444 | 0 |
| FBgn0262526 | vas | 1.351499927 | 0.821010457 | 1 |
| FBgn0051612 | CG31612 | 1.348580888 | 1.194202073 | 0 |
| FBgn0028525 | c(2)M | 1.345987766 | 0.944118348 | 0 |
| FBgn0020412 | JIL-1 | 1.331235641 | 0.6507793 | 1 |
| FBgn0028397 | Tob | 1.320020297 | 0.967020377 | 1 |
| FBgn0010894 | sinu | 1.309146363 | 0.833586444 | 0 |
| FBgn0259170 | alpha-Man-I | 1.307703635 | 0.543884325 | 1 |
| FBgn0037755 | CG12945 | 1.302757317 | 0.543638116 | 0 |
| FBgn0267228 | CR45668 | 1.301095441 | 1.702303851 | 1 |
| FBgn0087011 | CG41520 | 1.300823141 | 2.395193376 | 1 |
| FBgn0015025 | CkIIalpha-i1 | 1.299612378 | 1.461254652 | 1 |
| FBgn0085810 | CR41597 | 1.298857167 | 1.19627634 | 0 |
| FBgn0040324 | Ephrin | 1.295672576 | 0.644861943 | 1 |
| FBgn0052243 | CG32243 | 1.29386298 | 1.247772978 | 1 |
| FBgn0086898 | dgo | 1.292676322 | 0.903300268 | 0 |
| FBgn0002962 | nos | 1.292126131 | 0.322134693 | 0 |
| FBgn0031681 | pgant5 | 1.289314407 | 0.573997344 | 1 |
| FBgn0035702 | CG10147 | 1.283888273 | 1.001288666 | 0 |
| FBgn0037696 | GstZ1 | 1.277225864 | 1.115820582 | 0 |
| FBgn0038828 | CG17270 | 1.276950136 | 0.511018924 | 0 |
| FBgn0026379 | Pten | 1.275981306 | 1.242873479 | 1 |
| FBgn0266549 | CR45102 | 1.26978603 | 0.780948065 | 1 |
| FBgn0033767 | CG13148 | 1.260166918 | 1.681987383 | 0 |
| FBgn0011695 | PebIII | 1.252011564 | 2.212375785 | 0 |
| FBgn0003969 | vap | 1.248522663 | 0.573836008 | 1 |
| FBgn0026263 | bip1 | 1.239040305 | 0.55547956 | 0 |
| FBgn0000567 | Eip74EF | 1.238619335 | 1.257263001 | 1 |
| FBgn0036777 | CG7341 | 1.237868512 | 0.96900527 | 0 |
| FBgn0051320 | CG31320 | 1.233596311 | 0.594363635 | 0 |
| FBgn0038146 | CG9799 | 1.229413184 | 0.623503222 | 0 |
| FBgn0263916 | Ent2 | 1.220657936 | 0.651175572 | 1 |
| FBgn0038611 | CG14309 | 1.218704773 | 6.614299143 | 0 |
| FBgn0035608 | blanks | 1.20882322 | 2.862394887 | 0 |
| FBgn0261584 | CG42694 | 1.207738755 | 1.566093075 | 0 |
| FBgn0053062 | CG33062 | 1.191401772 | 2.217066586 | 1 |
| FBgn0000615 | exu | 1.190120908 | 0.714893574 | 1 |
| FBgn0024321 | NK7.1 | 1.185492688 | 0.606308713 | 0 |
| FBgn0036007 | path | 1.183571449 | 0.523862809 | 0 |
| FBgn0052625 | CG32625 | 1.177358418 | 1.929435587 | 1 |
| FBgn0010435 | emp | 1.173590632 | 1.521631581 | 0 |
| FBgn0032084 | CG13101 | 1.17098744 | 0.723853374 | 0 |
| FBgn0001341 | l(1)1Bi | 1.162596747 | 0.553554832 | 0 |
| FBgn0265487 | mbl | 1.162140005 | 0.736482974 | 1 |
| FBgn0260965 | CG42588 | 1.159449187 | 0.556269425 | 0 |
| FBgn0044826 | Pak3 | 1.159281886 | 0.505392982 | 0 |
| FBgn0036324 | CG12520 | 1.156538288 | 2.495315029 | 0 |
| FBgn0028743 | Dhit | 1.156057452 | 0.745153634 | 0 |
| FBgn0039928 | Cals | 1.154008538 | 0.866778434 | 1 |
| FBgn0035541 | CG15019 | 1.153570267 | 1.190560063 | 0 |
| FBgn0040153 | l(1)G0469 | 1.153534055 | 0.732201037 | 0 |
| FBgn0260932 | cuff | 1.152050246 | 0.898195783 | 0 |
| FBgn0039602 | CG1647 | 1.149004023 | 0.441979947 | 1 |
| FBgn0264617 | CR43957 | 1.138979401 | 2.01469819 | 1 |
| FBgn0051156 | CG31156 | 1.135427698 | 0.699850435 | 0 |
| FBgn0050096 | CG30096 | 1.128662964 | 0.716068916 | 0 |
| FBgn0004198 | ct | 1.126231192 | 1.891577717 | 1 |
| FBgn0261016 | clos | 1.114648829 | 0.46515042 | 1 |
| FBgn0031275 | GABA-B-R3 | 1.097033704 | 2.248641921 | 0 |
| FBgn0265665 | CR44472 | 1.092528987 | 2.12427302 | 0 |
| FBgn0262656 | dm | 1.086208816 | 0.617356476 | 0 |
| FBgn0016054 | phr6-4 | 1.083492028 | 0.777071301 | 1 |
| FBgn0050466 | CG30466 | 1.081794336 | 0.992221324 | 0 |
| FBgn0037963 | Cad87A | 1.081537964 | 0.354525001 | 1 |
| FBgn0003716 | tkv | 1.080474227 | 0.419667077 | 0 |
| FBgn0265159 | CR44228 | 1.076874497 | 0.695023837 | 0 |
| FBgn0036043 | CG8177 | 1.076576469 | 0.454136531 | 1 |
| FBgn0032480 | Edem2 | 1.070927645 | 0.552853603 | 0 |
| FBgn0015024 | CkIalpha | 1.065303893 | 0.947919391 | 0 |
| FBgn0085732 | CR40190 | 1.061044196 | 1.221116213 | 0 |
| FBgn0038721 | subdued | 1.054245228 | 0.717844144 | 0 |
| FBgn0026196 | nop5 | 1.048194702 | 0.621704073 | 0 |
| FBgn0050343 | CG30343 | 1.042971182 | 1.209239165 | 0 |
| FBgn0263039 | CR43334 | 1.041105551 | 1.285906401 | 1 |
| FBgn0016926 | Pino | 1.039019744 | 0.433245323 | 1 |
| FBgn0039754 | CG9747 | 1.036892652 | 3.594215101 | 0 |
| FBgn0031974 | CG12560 | 1.036752672 | 1.202372773 | 0 |
| FBgn0027864 | Ogg1 | 1.033972461 | 1.140569435 | 0 |
| FBgn0025693 | ZnT41F | 1.030153801 | 1.819146304 | 0 |
| FBgn0266707 | CR45197 | 1.028016075 | 1.341106911 | 0 |
| FBgn0039627 | CG11837 | 1.024408229 | 0.807875423 | 0 |
| FBgn0263111 | cac | 1.022086151 | 1.209095884 | 0 |
| FBgn0038419 | CG14879 | 1.02152543 | 2.061102819 | 0 |
| FBgn0034246 | Dcr-2 | 1.017706746 | 0.413981249 | 0 |
| FBgn0036922 | CG14182 | 1.017436191 | 0.601195451 | 0 |
| FBgn0033754 | Ak6 | 1.000475891 | 1.372727039 | 1 |
| FBgn0025936 | Eph | 0.997275853 | 0.735572078 | 1 |
| FBgn0001168 | h | 0.996749705 | 1.571086042 | 0 |
| FBgn0038455 | CG14907 | 0.993554524 | 0.810388011 | 0 |
| FBgn0028894 | CG5869 | 0.984177717 | 1.06942427 | 0 |
| FBgn0032208 | CG5604 | 0.981460532 | 0.374720478 | 1 |
| FBgn0036569 | CG5414 | 0.973688023 | 0.801247475 | 0 |
| FBgn0045800 | Uhg1 | 0.970470697 | 2.392898443 | 1 |
| FBgn0039241 | CG11089 | 0.969753297 | 0.411318335 | 0 |
| FBgn0011592 | fra | 0.959488022 | 0.514001457 | 0 |
| FBgn0266350 | CR44999 | 0.957284312 | 0.666818748 | 1 |
| FBgn0267081 | CR45525 | 0.956818461 | 1.317362935 | 1 |
| FBgn0037531 | CG10445 | 0.950364903 | 0.511457167 | 1 |
| FBgn0035986 | CG4022 | 0.947338706 | 0.672520145 | 0 |
| FBgn0031894 | CG4496 | 0.940945026 | 1.717255235 | 1 |
| FBgn0030583 | CG14410 | 0.940432744 | 2.097107612 | 0 |
| FBgn0051373 | CG31373 | 0.940142241 | 1.544891262 | 0 |
| FBgn0030573 | nmdyn-D6 | 0.932890758 | 0.561137908 | 1 |
| FBgn0015541 | sda | 0.931000189 | 1.852151383 | 0 |
| FBgn0267041 | CR45485 | 0.930613046 | 1.608902123 | 0 |
| FBgn0029686 | CG2941 | 0.929315517 | 0.664054033 | 0 |
| FBgn0266181 | CRG | 0.926461215 | 0.863982472 | 0 |
| FBgn0003444 | smo | 0.923243506 | 0.500663918 | 0 |
| FBgn0025800 | Smox | 0.922340607 | 0.575430688 | 1 |
| FBgn0261373 | CG33228 | 0.921826336 | 0.919122751 | 0 |
| FBgn0035083 | Tina-1 | 0.919806923 | 0.748479095 | 1 |
| FBgn0028426 | JhI-1 | 0.914345277 | 0.674607406 | 0 |
| FBgn0052554 | CG32554 | 0.900061188 | 1.04949435 | 0 |
| FBgn0030660 | CG8097 | 0.895027025 | 1.084697422 | 1 |
| FBgn0032305 | CG6700 | 0.890291389 | 0.478764622 | 0 |
| FBgn0036770 | Prestin | 0.889989579 | 0.405706801 | 0 |
| FBgn0030797 | CG13004 | 0.888221628 | 0.615105493 | 1 |
| FBgn0037000 | ZnT77C | 0.879456187 | 0.578352166 | 0 |
| FBgn0039890 | CG2316 | 0.878935169 | 0.584186207 | 1 |
| FBgn0260486 | Ziz | 0.875117164 | 0.615927354 | 0 |
| FBgn0039634 | alpha-Man-Ib | 0.872253371 | 0.361451408 | 0 |
| FBgn0262987 | CG43295 | 0.86642567 | 0.704587172 | 0 |
| FBgn0267365 | l(2)SH0834 | 0.855955777 | 0.854806155 | 1 |
| FBgn0267726 | CG46059 | 0.855422124 | 1.594535734 | 1 |
| FBgn0031265 | CG2794 | 0.852887925 | 0.668355849 | 0 |
| FBgn0035449 | CG14971 | 0.851553112 | 0.465815697 | 0 |
| FBgn0004914 | Hnf4 | 0.851290429 | 0.496171602 | 1 |
| FBgn0051510 | CG31510 | 0.848692318 | 0.635167928 | 1 |
| FBgn0039135 | CG13603 | 0.8466431 | 0.787019949 | 0 |
| FBgn0003345 | sd | 0.846259745 | 0.457309988 | 1 |
| FBgn0014388 | sty | 0.841081267 | 1.88978541 | 0 |
| FBgn0036988 | CG5262 | 0.838245113 | 0.59814821 | 0 |
| FBgn0032679 | bsf | 0.837587331 | 0.462944118 | 0 |
| FBgn0032957 | CG2225 | 0.836653784 | 1.012880547 | 1 |
| FBgn0266396 | CR45036 | 0.835293292 | 1.37625208 | 1 |
| FBgn0032815 | CG10462 | 0.831313906 | 0.846945327 | 1 |
| FBgn0039727 | CG15523 | 0.831024233 | 0.4102149 | 0 |
| FBgn0086350 | tef | 0.830468804 | 0.593901885 | 0 |
| FBgn0022984 | qkr58E-3 | 0.827266416 | 0.451120687 | 0 |
| FBgn0004882 | orb | 0.824647036 | 0.365518005 | 0 |
| FBgn0037552 | CG7800 | 0.823531019 | 2.111072344 | 0 |
| FBgn0004872 | piwi | 0.816749676 | 0.500767183 | 1 |
| FBgn0053095 | CG33095 | 0.812180469 | 0.497663637 | 1 |
| FBgn0053096 | CG33096 | 0.812180469 | 0.497663637 | 1 |
| FBgn0030400 | CG11138 | 0.811073476 | 0.880385281 | 1 |
| FBgn0051360 | CG31360 | 0.810357361 | 0.814538747 | 0 |
| FBgn0085432 | pan | 0.804315032 | 1.137468731 | 1 |
| FBgn0010263 | Rbp9 | 0.802010772 | 0.845351427 | 1 |
| FBgn0004055 | uzip | 0.79862595 | 1.316700958 | 0 |
| FBgn0052364 | CG32364 | 0.796218271 | 2.41321335 | 0 |
| FBgn0051262 | CG31262 | 0.794753198 | 2.357395523 | 0 |
| FBgn0036769 | Tsp74F | 0.793617634 | 0.652928794 | 0 |
| FBgn0032391 | escl | 0.792763526 | 0.486807982 | 1 |
| FBgn0028506 | CG4455 | 0.788897868 | 0.582567271 | 0 |
| FBgn0039462 | CG14252 | 0.788302278 | 1.124289767 | 0 |
| FBgn0038966 | pinta | 0.782800122 | 0.566206634 | 0 |
| FBgn0030745 | CG4239 | 0.782305912 | 0.587441988 | 1 |
| FBgn0038183 | CG9286 | 0.778113862 | 1.959897434 | 0 |
| FBgn0036117 | CG6321 | 0.770605491 | 0.80036721 | 0 |
| FBgn0038462 | CG17556 | 0.770577132 | 0.80384269 | 0 |
| FBgn0039273 | CG9996 | 0.769576929 | 0.930001571 | 0 |
| FBgn0050463 | CG30463 | 0.767001464 | 0.570920345 | 1 |
| FBgn0053051 | CG33051 | 0.766471026 | 1.48287646 | 1 |
| FBgn0035689 | CG7376 | 0.759700681 | 0.887333551 | 1 |
| FBgn0052196 | CG32196 | 0.757659559 | 1.411858474 | 1 |
| FBgn0263414 | CR43460 | 0.756362048 | 1.416879984 | 0 |
| FBgn0030091 | CG7065 | 0.755648653 | 0.875387688 | 1 |
| FBgn0037647 | RagA-B | 0.755502271 | 0.600673723 | 0 |
| FBgn0005278 | Sam-S | 0.753296481 | 0.484293372 | 1 |
| FBgn0038470 | CG18213 | 0.752751773 | 0.738073372 | 0 |
| FBgn0259709 | CG42363 | 0.748219974 | 1.035123686 | 1 |
| FBgn0259708 | CG42362 | 0.748219974 | 1.035123686 | 1 |
| FBgn0036620 | CG4842 | 0.747218329 | 0.834170327 | 0 |
| FBgn0031874 | CG13775 | 0.745356899 | 0.648396539 | 1 |
| FBgn0261882 | l(2)35Bc | 0.745211189 | 0.605172496 | 0 |
| FBgn0050428 | CG30428 | 0.745174565 | 1.669162893 | 1 |
| FBgn0053198 | pen-2 | 0.739863867 | 0.758112202 | 0 |
| FBgn0019938 | RpI1 | 0.739616873 | 0.392647776 | 0 |
| FBgn0259834 | out | 0.736590497 | 0.405437405 | 1 |
| FBgn0032620 | CG12288 | 0.73631566 | 0.683640727 | 0 |
| FBgn0261984 | Ire1 | 0.733099901 | 0.46609839 | 1 |
| FBgn0030724 | Nipsnap | 0.732026517 | 0.706091791 | 0 |
| FBgn0039765 | mRpS18C | 0.726395472 | 0.674312883 | 0 |
| FBgn0020909 | Rtc1 | 0.725624454 | 0.470061305 | 1 |
| FBgn0036714 | CG7692 | 0.722463849 | 0.780094531 | 1 |
| FBgn0085242 | CG34213 | 0.721864721 | 0.939128073 | 0 |
| FBgn0032452 | CG15484 | 0.714570716 | 1.392323014 | 0 |
| FBgn0263396 | sqd | 0.710073052 | 0.478896682 | 1 |
| FBgn0264270 | Sxl | 0.708252187 | 0.437448878 | 1 |
| FBgn0052016 | 4E-T | 0.705752344 | 0.657329734 | 1 |
| FBgn0005694 | Aef1 | 0.705581187 | 0.529819399 | 1 |
| FBgn0025631 | moody | 0.70457009 | 0.634792579 | 1 |
| FBgn0034528 | CG11180 | 0.703282374 | 0.749002796 | 0 |
| FBgn0001202 | hk | 0.69928539 | 0.509305107 | 1 |
| FBgn0031494 | CG17219 | 0.699173412 | 1.244921803 | 0 |
| FBgn0259979 | CG17337 | 0.698301162 | 0.504821044 | 1 |
| FBgn0262731 | pncr013:4 | 0.697146957 | 0.929960961 | 1 |
| FBgn0034500 | CG11200 | 0.694048826 | 1.541857811 | 0 |
| FBgn0033075 | Pld | 0.688306 | 0.515797769 | 1 |
| FBgn0038704 | CG5316 | 0.686682741 | 0.639970052 | 0 |
| FBgn0010350 | CdsA | 0.684762019 | 0.522627969 | 1 |
| FBgn0031213 | galectin | 0.6843378 | 0.540767395 | 0 |
| FBgn0262962 | CG43273 | 0.675522248 | 0.876369768 | 0 |
| FBgn0029944 | Dok | 0.672881863 | 0.471063775 | 0 |
| FBgn0052056 | scramb1 | 0.670183655 | 0.345991486 | 0 |
| FBgn0260874 | Ir76a | 0.669947609 | 1.168979393 | 0 |
| FBgn0036843 | CG6812 | 0.668151434 | 0.610946438 | 1 |
| FBgn0040602 | CG14545 | 0.666417285 | 0.735625263 | 0 |
| FBgn0264678 | CR43963 | 0.666350322 | 1.043542709 | 0 |
| FBgn0027865 | Tsp96F | 0.666089707 | 0.592241525 | 0 |
| FBgn0034143 | CG8303 | 0.666086688 | 3.417976546 | 0 |
| FBgn0051217 | modSP | 0.664166832 | 3.474935685 | 1 |
| FBgn0266719 | Unc-13-4B | 0.660864192 | 0.967288546 | 0 |
| FBgn0024177 | zpg | 0.660824291 | 0.633017365 | 0 |
| FBgn0052708 | CG32708 | 0.660618555 | 0.604369492 | 0 |
| FBgn0264089 | sli | 0.656972284 | 1.338744281 | 0 |
| FBgn0266096 | CR44833 | 0.65627194 | 0.90568765 | 1 |
| FBgn0067779 | dbr | 0.655159296 | 0.503701866 | 0 |
| FBgn0031645 | CG3036 | 0.654174297 | 0.623936818 | 1 |
| FBgn0036842 | CG3797 | 0.653696212 | 0.437712297 | 1 |
| FBgn0050108 | CG30108 | 0.651372416 | 1.413173801 | 0 |
| FBgn0028707 | Mt2 | 0.647353248 | 1.406090736 | 0 |
| FBgn0039431 | plum | 0.644136776 | 1.065572046 | 0 |
| FBgn0037556 | CG9636 | 0.643485844 | 0.554750198 | 0 |
| FBgn0033871 | CG13339 | 0.640231025 | 0.84307171 | 1 |
| FBgn0001234 | Hsromega | 0.639967417 | 1.336766712 | 1 |
| FBgn0035044 | CG3663 | 0.639264579 | 1.235086663 | 0 |
| FBgn0040271 | Sulf1 | 0.637851822 | 0.717796779 | 0 |
| FBgn0266699 | CR45189 | 0.637348591 | 0.864793317 | 0 |
| FBgn0036335 | mRpL20 | 0.634353517 | 0.763157019 | 1 |
| FBgn0002723 | Met | 0.631976984 | 0.597928902 | 1 |
| FBgn0026262 | bip2 | 0.631741534 | 0.525816893 | 1 |
| FBgn0030183 | CG15309 | 0.623639391 | 0.897715723 | 0 |
| FBgn0046776 | CR14033 | 0.620645713 | 0.896639287 | 0 |
| FBgn0038363 | Acyp2 | 0.619788298 | 0.856548015 | 0 |
| FBgn0031951 | r2d2 | 0.618333649 | 0.598169327 | 0 |
| FBgn0036773 | CG13698 | 0.616718192 | 0.459653601 | 1 |
| FBgn0037581 | CG7352 | 0.610292267 | 0.674453383 | 1 |
| FBgn0033261 | udd | 0.609189301 | 1.051201558 | 0 |
| FBgn0083068 | CG33947 | 0.605894827 | 0.581518404 | 1 |
| FBgn0260722 | CR42549 | 0.603453088 | 1.359810271 | 0 |
| FBgn0034179 | CG6805 | 0.597399114 | 0.932530111 | 0 |
| FBgn0037759 | CG8526 | 0.594582667 | 0.695366823 | 0 |
| FBgn0040634 | CG4186 | 0.58555087 | 0.937697038 | 1 |
| FBgn0033450 | Lsm11 | 0.585261102 | 0.706032399 | 0 |
| FBgn0014076 | Vm32E | 0.489878968 | 9.961383502 | 0 |
| FBgn0259822 | Ca-beta | 0.488417804 | 6.823213467 | 0 |
| FBgn0000427 | 1-Dec | 0.475728607 | 4.326389608 | 1 |
| FBgn0040370 | CG13375 | 0.513596245 | 2.632136219 | 0 |
| FBgn0264385 | CR43837 | 0.576081369 | 2.584358393 | 1 |
| FBgn0036368 | CG10738 | 0.339656449 | 1.570283961 | 0 |
| FBgn0265590 | CR44417 | 0.463199398 | 1.464385347 | 1 |
| FBgn0033548 | CG7637 | 0.447227604 | 1.402591992 | 1 |
| FBgn0035159 | CG13896 | 0.391434613 | 1.355476845 | 1 |
| FBgn0052281 | CG32281 | 0.428800008 | 1.33223655 | 0 |
| FBgn0027106 | Inx7 | 0.504431626 | 1.27607393 | 1 |
| FBgn0033459 | CG12744 | 0.322208793 | 1.232579801 | 1 |
| FBgn0034177 | CG6796 | 0.476614308 | 1.157953259 | 0 |
| FBgn0035094 | CG9380 | 0.508557499 | 1.14671764 | 1 |
| FBgn0034491 | Hsl | 0.489692734 | 1.136290808 | 0 |
| FBgn0035470 | Ccz1 | 0.406437255 | 1.11758738 | 0 |
| FBgn0042213 | CG18731 | 0.470149876 | 1.10143295 | 0 |
| FBgn0083986 | CG34150 | 0.570925588 | 1.055595864 | 0 |
| FBgn0038012 | CG10013 | 0.328051038 | 1.042490366 | 0 |
| FBgn0052205 | CR32205 | 0.555779047 | 1.041421094 | 0 |
| FBgn0031422 | CG9870 | 0.547708256 | 1.039937264 | 0 |
| FBgn0264384 | CR43836 | 0.575893863 | 1.032089918 | 1 |
| FBgn0085279 | CG34250 | 0.456571912 | 1.03156128 | 1 |
| FBgn0033032 | kune | 0.377301562 | 1.030964423 | 1 |
| FBgn0037345 | rev7 | 0.575557198 | 1.019913549 | 1 |
| FBgn0022246 | Rpp30 | 0.385007911 | 1.010829597 | 0 |
| FBgn0085192 | CG34163 | 0.412801811 | 1.003047748 | 0 |
| FBgn0036000 | CG3434 | 0.431557571 | 0.979185502 | 1 |
| FBgn0051133 | Slimp | 0.415234433 | 0.968684278 | 0 |
| FBgn0033547 | CG12935 | 0.376395563 | 0.942750763 | 1 |
| FBgn0250868 | CG42239 | 0.310269029 | 0.93657588 | 0 |
| FBgn0037011 | CG4858 | 0.533882709 | 0.934275012 | 1 |
| FBgn0031361 | CG17652 | 0.276270982 | 0.933629846 | 0 |
| FBgn0031678 | CG31918 | 0.564419302 | 0.921786095 | 0 |
| FBgn0035907 | GstO1 | 0.369598817 | 0.91932286 | 0 |
| FBgn0260388 | CG42514 | 0.268315354 | 0.91402975 | 0 |
| FBgn0263768 | CR43685 | 0.335232351 | 0.911811038 | 1 |
| FBgn0036332 | CG11261 | 0.479018845 | 0.907401308 | 1 |
| FBgn0085257 | CG34228 | 0.539426747 | 0.903076674 | 0 |
| FBgn0039835 | mRpL32 | 0.31722001 | 0.900879688 | 0 |
| FBgn0263131 | CG43373 | 0.269874477 | 0.894998415 | 0 |
| FBgn0039764 | CG15535 | 0.415460654 | 0.887233396 | 0 |
| FBgn0036193 | CG14135 | 0.459273548 | 0.870581726 | 0 |
| FBgn0263606 | Hsc20 | 0.381204124 | 0.861489503 | 0 |
| FBgn0042111 | CG18766 | 0.573227108 | 0.858993938 | 0 |
| FBgn0011705 | rost | 0.513828467 | 0.850616337 | 0 |
| FBgn0038341 | AdamTS-A | 0.273676337 | 0.837390023 | 0 |
| FBgn0040297 | Nhe2 | 0.514089143 | 0.836656337 | 1 |
| FBgn0033769 | CG8768 | 0.398935547 | 0.836641963 | 0 |
| FBgn0264747 | CG44005 | 0.376280026 | 0.823734887 | 0 |
| FBgn0085212 | CG34183 | 0.350035215 | 0.814467673 | 0 |
| FBgn0053276 | CG33276 | 0.539271258 | 0.802944134 | 0 |
| FBgn0262976 | lawc | 0.426243988 | 0.798398724 | 1 |
| FBgn0039271 | CG11839 | 0.294423777 | 0.794165439 | 0 |
| FBgn0052278 | CG32278 | 0.423332454 | 0.793823332 | 0 |
| FBgn0259722 | CG42376 | 0.511348997 | 0.791043359 | 0 |
| FBgn0266199 | CR44894 | 0.443831778 | 0.786400058 | 1 |
| FBgn0012051 | CalpA | 0.265686652 | 0.777557847 | 0 |
| FBgn0037667 | CG16734 | 0.270378094 | 0.772342669 | 0 |
| FBgn0033252 | CG12769 | 0.457272663 | 0.767835192 | 1 |
| FBgn0261437 | CSN8 | 0.281209641 | 0.759323597 | 1 |
| FBgn0036191 | Sug | 0.507253777 | 0.756193277 | 0 |
| FBgn0037617 | CG8145 | 0.325274032 | 0.751948532 | 0 |
| FBgn0032202 | CG18619 | 0.375029839 | 0.751789457 | 1 |
| FBgn0037009 | CG5104 | 0.48024675 | 0.749435182 | 0 |
| FBgn0029503 | CHORD | 0.374986481 | 0.748838046 | 0 |
| FBgn0032988 | Tif-IA | 0.433883002 | 0.747111462 | 1 |
| FBgn0004908 | Arl2 | 0.37791041 | 0.741307043 | 0 |
| FBgn0011241 | cbx | 0.329299683 | 0.73879646 | 1 |
| FBgn0037634 | hng2 | 0.580140915 | 0.731080002 | 0 |
| FBgn0042092 | CG13773 | 0.41185199 | 0.725341597 | 0 |
| FBgn0261258 | rgn | 0.523344996 | 0.724748702 | 1 |
| FBgn0065035 | AlkB | 0.325410094 | 0.723547739 | 1 |
| FBgn0035335 | mRpL23 | 0.408783049 | 0.722841971 | 0 |
| FBgn0031479 | Prx6005 | 0.482245184 | 0.720327887 | 0 |
| FBgn0031589 | CG3714 | 0.386259614 | 0.717941144 | 0 |
| FBgn0036793 | CG4174 | 0.293270519 | 0.716314369 | 1 |
| FBgn0036799 | CG13380 | 0.293270519 | 0.716314369 | 1 |
| FBgn0036147 | Plod | 0.360548828 | 0.706564633 | 1 |
| FBgn0034703 | CG3045 | 0.347477932 | 0.698931459 | 1 |
| FBgn0036330 | CG11263 | 0.347324408 | 0.695559609 | 1 |
| FBgn0051155 | Rpb7 | 0.327031866 | 0.694009544 | 0 |
| FBgn0033052 | SCAP | 0.422520279 | 0.693908138 | 1 |
| FBgn0010340 | 140up | 0.322369512 | 0.693465607 | 0 |
| FBgn0034893 | mRpL43 | 0.274680099 | 0.686722832 | 0 |
| FBgn0023528 | CG2924 | 0.359412238 | 0.680582309 | 0 |
| FBgn0010501 | Dcp-1 | 0.475071387 | 0.674303346 | 0 |
| FBgn0030744 | CG9992 | 0.537418648 | 0.673734685 | 1 |
| FBgn0037543 | CG10903 | 0.495780356 | 0.672101 | 0 |
| FBgn0030704 | CG15916 | 0.390090423 | 0.671659995 | 1 |
| FBgn0042178 | CG32165 | 0.345565801 | 0.670760903 | 0 |
| FBgn0259482 | Mob3 | 0.470296551 | 0.669994035 | 1 |
| FBgn0036165 | chrb | 0.346951508 | 0.665428638 | 0 |
| FBgn0039357 | CG4743 | 0.359664618 | 0.665116437 | 0 |
| FBgn0032986 | CG3262 | 0.245223579 | 0.659809321 | 1 |
| FBgn0032820 | fbp | 0.548700879 | 0.657332455 | 0 |
| FBgn0040778 | CG17977 | 0.5474754 | 0.655461689 | 1 |
| FBgn0039017 | CG6985 | 0.458470965 | 0.65155704 | 0 |
| FBgn0065081 | snmRNA:838 | 0.394101352 | 0.644709105 | 0 |
| FBgn0016131 | Cdk4 | 0.378783333 | 0.643688447 | 1 |
| FBgn0036557 | mRpS31 | 0.499297969 | 0.643595728 | 0 |
| FBgn0261049 | Vps45 | 0.411278613 | 0.642087337 | 0 |
| FBgn0037076 | ebd2 | 0.31801535 | 0.64119706 | 0 |
| FBgn0013435 | cdc2rk | 0.406480593 | 0.640104961 | 0 |
| FBgn0261403 | sxc | 0.268582062 | 0.63861248 | 1 |
| FBgn0003008 | or | 0.265811786 | 0.636111568 | 0 |
| FBgn0032251 | Nse4 | 0.331103196 | 0.635289624 | 1 |
| FBgn0032943 | Tsp39D | 0.366247664 | 0.629524245 | 1 |
| FBgn0039132 | AP-1sigma | 0.319525814 | 0.626591951 | 0 |
| FBgn0011824 | CG4038 | 0.238105942 | 0.619543216 | 0 |
| FBgn0039044 | p53 | 0.392506552 | 0.618390977 | 1 |
| FBgn0033372 | CG13742 | 0.404603509 | 0.608713549 | 0 |
| FBgn0035725 | Mis12 | 0.30352902 | 0.607656911 | 1 |
| FBgn0026238 | gus | 0.205440118 | 0.599676766 | 1 |
| FBgn0032524 | CG9267 | 0.371857127 | 0.599310719 | 0 |
| FBgn0052000 | CG32000 | 0.459845865 | 0.596592761 | 1 |
| FBgn0263219 | Dscam4 | 0.398472054 | 0.593754886 | 0 |
| FBgn0039929 | CG11076 | 0.233961303 | 0.586439232 | 1 |
| FBgn0037778 | mtTFB2 | 0.339536013 | 0.584739472 | 0 |
| FBgn0083940 | RhoU | 0.448427087 | 0.581078465 | 1 |
| FBgn0037737 | Pnn | 0.439691859 | 0.576671805 | 0 |
| FBgn0024510 | dlt | 0.422840287 | 0.57244509 | 0 |
| FBgn0034217 | Lhr | 0.337697773 | 0.571121182 | 0 |
| FBgn0035461 | ntc | 0.374206944 | 0.567083886 | 0 |
| FBgn0013303 | Nca | 0.405486847 | 0.564660305 | 1 |
| FBgn0035414 | CG14965 | 0.509085601 | 0.563605079 | 0 |
| FBgn0033741 | CG8545 | 0.173958238 | 0.561835747 | 0 |
| FBgn0022986 | qkr58E-1 | 0.55802649 | 0.561415314 | 0 |
| FBgn0015229 | glec | 0.30916443 | 0.560072693 | 1 |
| FBgn0026431 | Grip75 | 0.417720901 | 0.55131736 | 0 |
| FBgn0036909 | CG15881 | 0.237038286 | 0.549459419 | 0 |
| FBgn0263112 | Mitf | 0.455960939 | 0.54865379 | 1 |
| FBgn0003015 | osk | 0.176812377 | 0.547506682 | 0 |
| FBgn0260750 | Mulk | 0.569120789 | 0.544728847 | 1 |
| FBgn0027507 | CG1344 | 0.268228124 | 0.541378905 | 1 |
| FBgn0036929 | CG7668 | 0.274165199 | 0.539872497 | 1 |
| FBgn0036502 | CG7841 | 0.200136364 | 0.538798937 | 0 |
| FBgn0040465 | Dip3 | 0.500791248 | 0.538339312 | 0 |
| FBgn0037244 | CG14647 | 0.284118639 | 0.537111676 | 1 |
| FBgn0036152 | CG6175 | 0.539243209 | 0.532877239 | 1 |
| FBgn0028552 | gammaSnap1 | 0.297382609 | 0.531297911 | 1 |
| FBgn0039153 | CG5463 | 0.296925351 | 0.52921432 | 0 |
| FBgn0038545 | CG7713 | 0.449920251 | 0.528174394 | 0 |
| FBgn0033028 | CG11665 | 0.582517645 | 0.527314518 | 1 |
| FBgn0264975 | Nrg | 0.526886344 | 0.5248652 | 0 |
| FBgn0038473 | Ns1 | 0.25939624 | 0.522627698 | 0 |
| FBgn0028504 | CG12182 | 0.526826828 | 0.518255834 | 0 |
| FBgn0029175 | Ext2 | 0.456025796 | 0.517472614 | 0 |
| FBgn0037279 | CG1129 | 0.319022002 | 0.515886964 | 1 |
| FBgn0026148 | CG12253 | 0.323302931 | 0.513780691 | 1 |
| FBgn0259152 | Clbn | 0.484823098 | 0.512200785 | 0 |
| FBgn0001122 | Galphao | 0.507974455 | 0.51056542 | 0 |
| FBgn0033816 | CG4679 | 0.266529211 | 0.510276251 | 0 |
| FBgn0086779 | step | 0.21827856 | 0.510137117 | 1 |
| FBgn0023213 | eIF4G | 0.418462324 | 0.509385042 | 1 |
| FBgn0032955 | CG2201 | 0.379586176 | 0.509371182 | 1 |
| FBgn0025549 | unc-119 | 0.320801107 | 0.508679849 | 0 |
| FBgn0030694 | CG15602 | 0.416794467 | 0.50690744 | 0 |
| FBgn0026787 | Nhe1 | 0.448363643 | 0.506510827 | 1 |
| FBgn0037082 | CG5664 | 0.467636531 | 0.505264802 | 0 |
| FBgn0004435 | Galphaq | 0.211967572 | 0.503551042 | 0 |
| FBgn0037293 | CG12007 | 0.464912559 | 0.498511327 | 0 |
| FBgn0032217 | CG4972 | 0.381701414 | 0.498492465 | 1 |
| FBgn0035703 | CG8270 | 0.439528768 | 0.495237949 | 0 |
| FBgn0028394 | CG17834 | 0.434272979 | 0.495112585 | 0 |
| FBgn0266487 | CG45086 | 0.201920054 | 0.495107909 | 0 |
| FBgn0035444 | CG12012 | 0.281994696 | 0.494079477 | 0 |
| FBgn0026777 | Rad23 | 0.309845732 | 0.493696572 | 1 |
| FBgn0038197 | foxo | 0.407511701 | 0.49346545 | 0 |
| FBgn0033995 | GPHR | 0.510942508 | 0.490217496 | 0 |
| FBgn0035440 | CG14969 | 0.344847239 | 0.489826869 | 0 |
| FBgn0038100 | Paip2 | 0.565168767 | 0.484572557 | 0 |
| FBgn0028744 | CG5033 | 0.205009417 | 0.482093533 | 0 |
| FBgn0037120 | CG11247 | 0.267046299 | 0.476236435 | 1 |
| FBgn0024734 | PRL-1 | 0.496419253 | 0.471991757 | 0 |
| FBgn0031150 | bves | 0.219616124 | 0.470643742 | 1 |
| FBgn0026086 | Adar | 0.277974787 | 0.465095911 | 1 |
| FBgn0032880 | CG9318 | 0.494334232 | 0.462961178 | 0 |
| FBgn0010315 | CycD | 0.209054565 | 0.46122243 | 1 |
| FBgn0036999 | isoQC | 0.309665656 | 0.460706376 | 1 |
| FBgn0036892 | Lon | 0.553163196 | 0.458534506 | 0 |
| FBgn0266673 | Sec10 | 0.323862814 | 0.456939715 | 0 |
| FBgn0033761 | CG8778 | 0.395025076 | 0.454972728 | 1 |
| FBgn0051495 | CG31495 | 0.391640888 | 0.450069435 | 0 |
| FBgn0033544 | CG7220 | 0.237888255 | 0.450016449 | 0 |
| FBgn0032168 | CG13126 | 0.284353607 | 0.447539547 | 0 |
| FBgn0261380 | mRpL37 | 0.307212363 | 0.443940507 | 0 |
| FBgn0034113 | CG8060 | 0.457615364 | 0.443262362 | 0 |
| FBgn0015614 | CanB2 | 0.414766703 | 0.441861815 | 1 |
| FBgn0052579 | CG32579 | 0.227408256 | 0.439973375 | 1 |
| FBgn0034187 | CG6967 | 0.456753128 | 0.439259428 | 0 |
| FBgn0039909 | CG1970 | 0.294095924 | 0.438410575 | 1 |
| FBgn0035336 | CG9004 | 0.424092238 | 0.438063981 | 0 |
| FBgn0038432 | CG14883 | 0.456876595 | 0.435662449 | 0 |
| FBgn0035295 | Cnb | 0.212392552 | 0.426698888 | 0 |
| FBgn0036838 | CG3808 | 0.408922426 | 0.426624726 | 1 |
| FBgn0032231 | CG5056 | 0.276939683 | 0.426614546 | 1 |
| FBgn0035073 | CG16896 | 0.500676577 | 0.422449506 | 0 |
| FBgn0034933 | CG3735 | 0.23067854 | 0.419265841 | 1 |
| FBgn0028380 | fal | 0.345373755 | 0.418988542 | 0 |
| FBgn0038672 | CG6005 | 0.487344053 | 0.412044799 | 0 |
| FBgn0051523 | CG31523 | 0.208808916 | 0.411159062 | 1 |
| FBgn0036998 | CG5969 | 0.258709758 | 0.403358212 | 1 |
| FBgn0043012 | AP-2sigma | 0.32583894 | 0.401480346 | 0 |
| FBgn0263398 | CG6364 | 0.3681051 | 0.393230353 | 1 |
| FBgn0000114 | aret | 0.508390622 | 0.39029914 | 0 |
| FBgn0024698 | Cpsf160 | 0.582981261 | 0.388506859 | 1 |
| FBgn0011837 | Tis11 | 0.534819228 | 0.385691376 | 1 |
| FBgn0033413 | prel | 0.474666543 | 0.38538066 | 0 |
| FBgn0034368 | CG5482 | 0.232557859 | 0.381264501 | 0 |
| FBgn0035942 | CG5660 | 0.559112664 | 0.367673479 | 0 |
| FBgn0263133 | ico | 0.495900582 | 0.356907072 | 1 |
| FBgn0015791 | Rab14 | 0.236939312 | 0.354837036 | 0 |
| FBgn0024889 | Kap-alpha1 | 0.305516351 | 0.351382813 | 0 |
| FBgn0261548 | CG42666 | 0.300488577 | 0.344869677 | 1 |
| FBgn0028554 | x16 | 0.41418822 | 0.339300967 | 0 |
| FBgn0030520 | Pdcd4 | 0.171202193 | 0.317664653 | 1 |
| FBgn0038575 | CG7208 | 0.5333181 | 0.308384014 | 0 |

**VI. SUPPLEMENTARY REFERENCES**

Chang, K., K. Marran, A. Valentine, and G. J. Hannon, 2014 Generation of transgenic Drosophila expressing shRNAs in the miR-1 backbone. Cold Spring Harb Protoc 2014(5). doi:10.1101/pdb.prot080762

Port F, H. M. Chen, T. Lee, and S. L. Bullock, 2014 Optimized CRISPR/Cas tools for efficient germline and somatic genome engineering in Drosophila. P.N.A.S. 111(29):E2967-E2976.

Vert, J. P., N. Foveau, C. Lajaunie, and Y. Vandenbrouck, 2006 An accurate and interpretable model for siRNA efficacy prediction. *BMC* Bioinformatics 7:520. doi:10.1186/1471-2105-7-520
